# Supplementary material for: Review of the global models used within phase 1 of the Chemistry–Climate Model Initiative (CCMI)
Source: Copernicus journal article supplement (doi:10.5194/gmd-10-639-2017), 2017-02-13
Supplement: Supplementary file [file gmd-10-639-2017-supplement.pdf]

Supplement of Geosci. Model Dev., 10, 639–671, 2017  
<http://www.geosci-model-dev.net/10/639/2017/>  
doi:10.5194/gmd-10-639-2017-supplement  
© Author(s) 2017. CC Attribution 3.0 License.

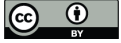

*Supplement of*

## **Review of the global models used within phase 1 of the Chemistry–Climate Model Initiative (CCMI)**

**O. Morgenstern et al.**

*Correspondence to:* Olaf Morgenstern (olaf.morgenstern@niwa.co.nz)

The copyright of individual parts of the supplement might differ from the CC-BY 3.0 licence.

Abbreviations used below are as in the CCMVal-2 report, chapter 2 (SPARC CCMVal (2010), SPARC Report on the evaluation of chemistry-climate models, SPARC report no. 5, WCRP-132)

Table S1: Main structure of CCMs (description of submodules used in model setup if applicable). The ocean and sea ice set-up refers to the REF-C2 and SEN-C2 simulations.

| Model name                  | Atmosphere                                     | Ocean                                        | Land                                   | Sea ice                                      | Comments                                                                                                                               |
|-----------------------------|------------------------------------------------|----------------------------------------------|----------------------------------------|----------------------------------------------|----------------------------------------------------------------------------------------------------------------------------------------|
| ACCESS CCM                  | HadGEM3 Global Atmosphere 2.0                  | prescribed HadGEM2-ES (r1p1i1 CMIP5)         | MOSES2                                 | prescribed HadGEM2-ES (r1p1i1 CMIP5)         | Stone et al. (2015)                                                                                                                    |
| CCSRNIES MIROC3.2           | MIROC3.2                                       | prescribed                                   | MIROC3.2                               | prescribed                                   | SST and SIC from MIROC for IPCC-AR5                                                                                                    |
| CESM1 CAM4-chem CESM1 WACCM | CAM4                                           | POP2                                         | CLM4                                   | CICE4                                        | Neale et al. (2013)                                                                                                                    |
| CHASER (MIROC-ESM)          | MIROC 4.8 (CCSR/NIES AGCM)                     | COCO4                                        | MATSIRO                                | calculated in MIROC                          | Watanabe et al (2011)                                                                                                                  |
| CMAM                        | CCCma AGCM3                                    | prescribed from CanCM4 CMIP5 simulations     | CLASS 2.7                              | prescribed from CanCM4 CMIP5 simulations     |                                                                                                                                        |
| CNRM-CM5-3                  | ARPEGE-Climate v6.04                           | HadISST1 (prescribed)                        |                                        | HadISST1 (prescribed)                        |                                                                                                                                        |
| EMAC                        | ECHAM5.3.02                                    | prescribed HadGEM2-ES (Collins et al., 2011) | ECHAM5                                 | prescribed HadGEM2-ES (Collins et al., 2011) | one REF-C2 simulation with interactive ocean model (MPIOM 1.3.0)                                                                       |
| GEOSCCM                     | GEOS-5                                         | prescribed CESM1                             | CLSM                                   | prescribed CESM1                             |                                                                                                                                        |
| GFDL-AM3                    | AM3                                            | prescribed HadISST2                          | LM3                                    | prescribed HadISST2                          | Donner et al. (2011)<br>Lin et al. (2012a, 2012b, 2014, 2015a, 2015b)                                                                  |
| GFDL-CM3                    | AM3                                            | interactive (Griffies et al. (2011))         | LM3                                    | Interactive (Griffies et al., 2011)          | Donner et al. (2011), Griffies et al. (2011)                                                                                           |
| HadGEM3-ES                  | Global Atmosphere 4.0 configuration of HadGEM3 | NEMO vn3.4                                   | Global Land 4.0 configuration of JULES | CICE vn4.1                                   | Walters et al. (2014), Madec et al. (2008), Hunke et al. (2008), Morgenstern et al. (2009), O'Connor et al. (2014), Best et al. (2011) |
| LMDz-REPROBUS               | L39 : LMDZ5<br>L79 : LMDZ6                     | L39 : N/A<br>L79 : NEMO                      | L39 : N/A<br>L79 : ORCHIDEE            | L39 : N/A<br>L79 : LIM                       | Dufresnes et al. (2013)                                                                                                                |
| MRI-ESM1r1                  | MRI-AGCM3                                      | MRI.COM3                                     | HAL                                    | MRI.COM3                                     | Yukimoto et al. (2011)                                                                                                                 |
| NIWA-UKCA                   | HadGEM3 GA2                                    | NEMO                                         | MOSES2                                 | CICE 4.0                                     | Hewitt et al. (2011); Morgenstern et al. (2014)                                                                                        |
| SOCOL                       | ECHAM5.4.00                                    | prescribed                                   | ECHAM5                                 | prescribed                                   | Roekner et al. (2003, 2006)                                                                                                            |
| ULAQ CCM                    | ULAQ CCM                                       | prescribed HadISST1                          | N/A                                    | prescribed HadISST1                          | SST&SIC from:<br>HadISST1 (1960-2010)<br>CCSM4.CAM(2011-2100)                                                                          |
| UMSLIMCAT                   | UM4.5                                          | prescribed                                   | NA                                     | precribed                                    | SST&SIC from:<br>HadGEM2-ES                                                                                                            |
| UMUKCA-UCAM                 | MetUM vn7.3<br>HadGEM3-A r2.0                  | Prescribed                                   | MOSES2                                 | Prescribed                                   | SST & SIC from HadGEM2-ES RCP6.0 r2i1p1 ensemble member                                                                                |

Table S2: Vertical resolution (numbers of levels) in different pressure ranges

| Model name                                 | >850 hPa            | 850 – 300 hPa       | 300 – 100 hPa        | 100 – 1 hPa         | Above 1 hPa        | Comments                            |
|--------------------------------------------|---------------------|---------------------|----------------------|---------------------|--------------------|-------------------------------------|
| ACCESS CCM<br>NIWA-UKCA<br>UMUKCA-<br>UCAM | 8                   | 13                  | 7                    | 22                  | 10                 | US standard atmosphere              |
| CCSRNIES<br>MIROC3.2                       | 4                   | 5                   | 6                    | 13                  | 6                  |                                     |
| CESM1<br>CAM4-chem                         | 4                   | 7                   | 7                    | 8                   | 0                  |                                     |
| CESM1<br>WACCM                             | 4                   | 7                   | 7                    | 21                  | 27                 |                                     |
| CHASER<br>(MIROC-ESM)                      | 5                   | 9                   | 11                   | 24                  | 1                  |                                     |
| CMAM                                       | 10                  | 12                  | 7                    | 20                  | 22                 |                                     |
| CNRM-CM5-3                                 | 12                  | 15                  | 8                    | 21                  | 4                  | In the case of 60 level simulations |
| EMAC                                       | 5 (6)               | 11 (13)             | 11 (7)               | 48 (15)             | 15 (6)             | L90MA (L47MA); (ha+hb*101325)/100   |
| GEOSCCM                                    | 10                  | 18                  | 7                    | 23                  | 14                 |                                     |
| GFDL-<br>CM3/AM3                           | 9                   | 10                  | 5                    | 16                  | 9                  | Donner et al. (2011).               |
| HadGEM3-ES                                 | 12                  | 23                  | 13                   | 28                  | 9                  | Geometric height grid.              |
| LMDz-<br>REPROBUS                          | L39 : 7<br>L79 : 21 | L39 : 7<br>L79 : 14 | L39 : 14<br>L79 : 23 | L39 : 6<br>L79 : 12 | L36 : 5<br>L79 : 9 |                                     |
| MRI-ESM1r1                                 | 12                  | 15                  | 14                   | 30                  | 9                  |                                     |
| MOCAGE                                     | 8                   | 13                  | 9                    | 17                  | 0                  |                                     |
| SOCOL                                      | 5                   | 6                   | 5                    | 15                  | 8                  |                                     |
| ULAQ CCM                                   | 3                   | 12                  | 14                   | 57                  | 40                 | 568m resolution (pressure altitude) |
| UMSLIMCAT                                  | 4                   | 13                  | 9                    | 24                  | 14                 |                                     |

Table S3: Transport and chemistry schemes. SL = semi-Lagrangian. FFSL = flux-form semi-Lagrangian. FFEE = flux-form Euler Equations, PRM = Piecewise Rational Method. FV = finite-volume.

| Model name              | Transport model for meteorologically active constituents          | Transport model for chemically active constituents                                                        | Chemistry scheme                                                                                                                              |
|-------------------------|-------------------------------------------------------------------|-----------------------------------------------------------------------------------------------------------|-----------------------------------------------------------------------------------------------------------------------------------------------|
| ACCESS CCM<br>NIWA-UKCA | SL                                                                | SL                                                                                                        | Morgenstern et al. (2013);<br>Isoprene: Pöschl et al. (2000)                                                                                  |
| CCSRNIES<br>MIROC3.2    | FFSL                                                              | FFSL                                                                                                      | Akiyoshi (1997)<br>Akiyoshi (2000)<br>Akiyoshi et al. (2009)                                                                                  |
| CESM1 CAM4-<br>chem     | FV                                                                | FV (Lin and Rood, 1996; Lin, 2005)                                                                        | Kinnison et al. (2007), Solomon et al. (2015), Tilmes et al. (2016)                                                                           |
| CESM1 WACCM             | FV                                                                | FV (Lin and Rood, 1996; Lin, 2005)                                                                        | Kinnison et al. (2007), Solomon et al. (2015)                                                                                                 |
| CHASER<br>(MIROC-ESM)   | MIROC (2 <sup>nd</sup> order van Leer)                            | MIROC (2 <sup>nd</sup> order van Leer)                                                                    | Sudo et al. (2002,2007);<br>Isoprene: Pöschl et al. (2000)                                                                                    |
| CMAM                    | spectral advection of 'hybrid' moisture (Merryfield et al., 2003) | spectral advection with 'hybrid' transformation used for certain species with strong horizontal gradients | Mechanism largely as in Jonsson et al. (2004), but solved throughout model domain                                                             |
| CNRM-CM5-3              | Semi-lagrangian with cubic interpolation Déqué (2007)             | Semi-lagrangian with cubic interpolation Déqué (2007)                                                     | REPROBUS (Lefèvre, 1994)                                                                                                                      |
| EMAC                    | FFSL (Lin and Rood, 1996)                                         | FFSL (Lin and Rood, 1996)                                                                                 | MECCA (Sander et al. 2011a)                                                                                                                   |
| GEOSCCM                 | GEOS-5                                                            | GEOS-5                                                                                                    | GMI (Strahan et al., 2007; Duncan et al., 2007)                                                                                               |
| GFDL-CM3/AM3            | Putman and Lin (2007)                                             | Putman and Lin (2007)                                                                                     | Naik et al. (2013); Austin et al. (2013).<br>Isoprene: Horowitz et al. (2007)                                                                 |
| HadGEM3-ES              | GA4.0 HadGEM3                                                     | GA4.0 HadGEM3                                                                                             | Combined stratosphere chemistry from Morgenstern et al. (2009) and the TropIsop chemistry from O'Connor et al. (2014) called StratTrop (UKCA) |
| LMDz-<br>REPROBUS       | LMDz                                                              | LMDz                                                                                                      | Hourdin et al. (2006)                                                                                                                         |
| MRI-ESM1r1              | Hybrid SL quintic and PRM (Yukimoto et al., 2011)                 | Hybrid SL quintic and PRM (Yukimoto et al., 2011)                                                         | Deushi and Shibata (2011)                                                                                                                     |
| MOCAGE                  | None (CTM)                                                        | SL (Williamson and Rasch, 1989)                                                                           | Stockwell et al (1997)<br>Lefevre et al (1994)                                                                                                |
| SOCOL                   | FFSL (Lin and Rood (1996))                                        | FFSL (Lin and Rood (1996))                                                                                | Stenke et al. (2013)<br>Isoprene: Pöschl et al. (2000)                                                                                        |
| ULAQ CCM                | FFEE                                                              | FFEE                                                                                                      | Sovde et al. (2014)                                                                                                                           |
| UMUKCA-<br>UCAM         | SL                                                                | SL                                                                                                        | Morgenstern et al. (2009),<br>Bednarz. et al (2016)                                                                                           |

Table S4: Transport scheme, by tracer. FV = finite volume. FFSL = flux-form semi-Lagrangian. SL = semi-Lagrangian. FFEE = flux-form Eulerian explicit. (table 2.4 of SPARC CCMVal, 2010)

| Model name                                           | Physical tracers          | Water vapour                             | Other chemical tracers    | References                                          |
|------------------------------------------------------|---------------------------|------------------------------------------|---------------------------|-----------------------------------------------------|
| ACCESS CCM<br>HadGEM3-ES<br>NIWA-UKCA<br>UMUKCA-UCAM | SL, quasi-cubic           | SL. Hor.: Quasi-cubic.<br>Vert.: quintic | As water vapour           | Priestley (1993)                                    |
| CCSRNIES<br>MIROC3.2<br>CHASER (MIROC-<br>ESM)       | FFSL                      | FFSL                                     | FFSL                      | Hasumi and Emori (2004)                             |
| EMAC<br>GEOSCCM<br>SOCOL                             | FFSL                      | FFSL                                     | FFSL                      | Lin and Rood (1996)                                 |
| GFDL-CM3/AM3                                         | FFSL                      | FFSL                                     | FFSL                      | Lin and Rood (1996, 1997)                           |
| LMDz-REPROBUS                                        | FV                        | FV                                       | FV                        | Hourdin and Armengaud (1999), Hourdin et al. (2006) |
| MRI-ESM1r1                                           | Hybrid SL quintic and PRM | Hybrid SL quintic and PRM                | Hybrid SL quintic and PRM | Yukimoto et al. (2011)                              |
| MOCAGE                                               | SL, tricubic              | SL, tricubic                             | SL, tricubic              | Williamson and Rasch (1998)                         |
| ULAQ CCM                                             | FFEE                      | FFEE                                     | FFEE                      |                                                     |

Table S5: Additional horizontal grids in CCMs. Models not listed do not have any additional grid. Cf table 2.3 of SPARC CCMVal (2010).

| Model name        | Grid                                                     | Comments                                         |
|-------------------|----------------------------------------------------------|--------------------------------------------------|
| CCSRNIES MIROC3.2 | Quadratic Gaussian (T42, 2.8°)                           | Physics and chemistry                            |
| EMAC              | Quadratic Gaussian (T42, 2.8°)                           | Physics and chemistry                            |
| GEOSCCM           | Catchment                                                | <i>Koster et al. (2000)</i>                      |
| MRI-ESM1r1        | Gaussian (TL159 (1.125°), TL95 (1.875°), and T42 (2.8°)) | Physics (TL159), aerosol (TL95), chemistry (T42) |
| SOCOL             | T42 (2.8°) Gaussian                                      | Physics, chemistry, radiation                    |



Table S7: Horizontal diffusion (cf. table 2.7 of SPARC CCMVal, 2010)

| Model name                                 | Order of diffusion scheme | Linear | Damping time scale of smallest scales (h) | Treatment at model top | Reference                                                      | Comment                                                                                                                                                                                                                                                                                                                                                                                                                                                                       |
|--------------------------------------------|---------------------------|--------|-------------------------------------------|------------------------|----------------------------------------------------------------|-------------------------------------------------------------------------------------------------------------------------------------------------------------------------------------------------------------------------------------------------------------------------------------------------------------------------------------------------------------------------------------------------------------------------------------------------------------------------------|
| ACCESS CCM<br>NIWA-UKCA<br>UMUKCA-<br>UCAM | N/A                       | N/A    | N/A                                       | Sponge                 | McCalpin (1988)                                                | No explicit diffusion in lower 54 levels (except over the poles)                                                                                                                                                                                                                                                                                                                                                                                                              |
| CCSRNIES<br>MIROC3.2                       | 4                         | Yes    | 18                                        | Sponge                 | Numaguti et al. (1997)                                         |                                                                                                                                                                                                                                                                                                                                                                                                                                                                               |
| CHASER<br>(MIROC-ESM                       | 4                         | N/A    | 16                                        | Sponge                 | Numaguti et al. (1997)                                         |                                                                                                                                                                                                                                                                                                                                                                                                                                                                               |
| CESM1<br>CAM4-chem<br>CESM1<br>WACCM       | 4                         |        |                                           | Sponge                 | Lauritzen et al.<br>Neale et al. (2010)<br>Neale et al. (2013) |                                                                                                                                                                                                                                                                                                                                                                                                                                                                               |
| CMAM                                       |                           |        | 13.9                                      |                        | Koshyk and Boer (1995)                                         | Modified Leith diffusion                                                                                                                                                                                                                                                                                                                                                                                                                                                      |
| CNRM-CM5-3                                 | 6                         | Yes    |                                           |                        | Yessad (2001)                                                  |                                                                                                                                                                                                                                                                                                                                                                                                                                                                               |
| EMAC                                       | 10                        | No     | 9                                         | Sponge                 | Roeckner et al. (2003)                                         |                                                                                                                                                                                                                                                                                                                                                                                                                                                                               |
| GEOSCCM                                    | N/A                       | N/A    | N/A                                       | Sponge                 |                                                                | No explicit diffusion                                                                                                                                                                                                                                                                                                                                                                                                                                                         |
| GFDL-<br>CM3/AM3                           |                           |        |                                           |                        |                                                                | Donner et al. (2011)                                                                                                                                                                                                                                                                                                                                                                                                                                                          |
| HadGEM3-ES                                 | N/A                       | N/A    | N/A                                       | No sponge              | McCalpin (1988)                                                | No explicit diffusion except:<br>1. There is targeted local 1st order diffusion of water vapour where vertical velocity above a certain threshold.<br>2. A 1-2-1 filter in E-W direction is applied to potential temperature and horizontal winds at high latitudes. As the poles are approached the filter is applied multiple times to try and retain the same physical scale length in the fields, removing the variations at very small scales as the meridians converge. |
| LMDz-<br>REPROBUS                          | NA                        | NA     | NA                                        | Sponge                 | Lott et al. (2005) ;<br>Dufresnes et al. (2013)                |                                                                                                                                                                                                                                                                                                                                                                                                                                                                               |
| MRI-ESM1r1                                 | 4                         | Yes    | 3.2 (p>150 hPa)<br>60 (p<100 hPa)         | No sponge              |                                                                |                                                                                                                                                                                                                                                                                                                                                                                                                                                                               |
| MOCAGE                                     | N/A                       | N/A    | N/A                                       |                        |                                                                | no explicit diffusion                                                                                                                                                                                                                                                                                                                                                                                                                                                         |
| SOCOL                                      | 10                        | No     | 9                                         | sponge                 | Roeckner et al. (2003)                                         |                                                                                                                                                                                                                                                                                                                                                                                                                                                                               |
| ULAQ CCM                                   | 2                         | Yes    | 10                                        | sponge                 |                                                                |                                                                                                                                                                                                                                                                                                                                                                                                                                                                               |

Table S8: Usage of QBO nudging in CCMI simulations: model name; experiments run with QBO nudging (other than the specified-dynamics simulations). Models not listed here do not use QBO nudging. CF table 2.8 of SPARC CCMVal (2010).

| Model name                           | Experiments including QBO nudging | Nudged variable | Timescale [day]          | Latitude range [°]                                                 | Height range [hPa] or [km]                                                                                                                  | Comments                       |
|--------------------------------------|-----------------------------------|-----------------|--------------------------|--------------------------------------------------------------------|---------------------------------------------------------------------------------------------------------------------------------------------|--------------------------------|
| CCSRNIES<br>MIROC3.2                 | All                               | <u>             | 5                        | Gaussian function from the equator with a half-width of 10 degrees | Gaussian function from 30km with a half-width of 8km                                                                                        | Akiyoshi et al. (2009)         |
| CESM1<br>CAM4-chem<br>CESM1<br>WACCM | All                               | U               | 10                       | Gaussian function from the equator with a half-width of 10 degrees | 90 - 3 hPa                                                                                                                                  | Giorgetta (1996)               |
| CHASER<br>(MIROC-<br>ESM)            | REF-C1SD                          | U               | 1.0                      | <10°                                                               | 20-50 km                                                                                                                                    |                                |
| EMAC                                 | All                               | U               | 58 (L90MA)<br>10 (L47MA) | 12.6°S - 12.6°N with full nudging at latitudes from 7 S-7 N        | 10-90 hPa, with full nudging weights (i.e., 1.0) from 20-50 hPa, levelling off to 0.3 (0.2) at the upper (lower) edge of the nudging region | Giorgetta and Bengtsson (1999) |
| SOCOL                                | All                               | U               | 7                        | 10°S - 10°N (full)<br>20°S - 10°S,<br>10°N - 20°N (tapered)        | 90 - 3 hPa                                                                                                                                  | Giorgetta (1996)               |
| ULAQ CCM                             | All                               | U               | 10                       | 10°S - 10°N                                                        | 90 - 3 hPa                                                                                                                                  | Giorgetta (1996)               |



Table S9: Orographic and non-orographic gravity wave drag (table 2.9 of SPARC CCMVal, 2010)

| Model name                                 | Reference for orographic GWD                  | Sources for nonorographic GWG                                                                           | Launch level for prescribed gravity waves | Latitude range for parameterized gravity waves | Reference for nonorographic GWD             |
|--------------------------------------------|-----------------------------------------------|---------------------------------------------------------------------------------------------------------|-------------------------------------------|------------------------------------------------|---------------------------------------------|
| ACCESS CCM<br>NIWA-UKCA<br>UMUKCA-<br>UCAM | Webster et al. (2003)                         | Prescribed                                                                                              | Parameterized                             | 90S-90N                                        | Scaife et al. (2002)                        |
| CCSRNIES<br>MIROC3.2                       | McFarlane(1987)                               | Parameterized                                                                                           | Parameterized                             | 90S-90N                                        | Hines (1997)                                |
| CESM1 CAM4-<br>chem                        | McFarlane (1987); Tilmes et al. (2016).       | Parameterized                                                                                           | Parameterized                             | 90S-90N                                        | Beres et al. (2005); Richter et al. (2010). |
| CESM1<br>WACCM                             | McFarlane (1987); Garcia et al. (2016).       | Parameterized                                                                                           | Parameterized                             | 90S-90N                                        | Beres et al. (2005); Richter et al. (2010). |
| CHASER<br>(MIROC-ESM)                      | McFarlane (1987)                              | Parameterised                                                                                           |                                           |                                                | Hines (1997a,b)                             |
| CMAM                                       | Scinocca and McFarlane (2000)                 | Specified generalised Desaubies                                                                         | 100 hPa for non-orographic                | 90S-90N                                        | Scinocca (2003)                             |
| CNRM-CM 5-3                                | Lott (1997)                                   | stochastic parameterization of non-orographic gravity waves triggered by convection (Lott et al., 2013) | N/A                                       | 90S-90N                                        | Lott et al. (2013)                          |
| EMAC                                       | Lott and Miller (1997), Lott (1999)           | Parameterized                                                                                           | 640 hPa                                   | 90S-90N                                        | Hines (1997a,b)                             |
| GEOSCCM                                    | McFarlane (1987)                              | Parameterized                                                                                           | 100 hPa                                   | 90S-90N                                        | Garcia and Boville (1994)                   |
| GFDL-<br>CM3/AM3                           | Anderson et al. (2004), Donner et al. (2011). |                                                                                                         |                                           |                                                | Alexander and Dunkerton (1999)              |
| HadGEM3-ES                                 | Walters et al. (2014)                         | Prescribed                                                                                              | Prescribed                                | 90S-90N                                        | Walters et al. (2014)                       |
| LMDz-<br>REPROBUS                          | Lott et al. (2005)                            | Parameterized                                                                                           | Parameterized                             | 90S-90N                                        | Lott et al. (2015)                          |
| MRI-ESM1r1                                 | Iwasaki et al. (1989)                         | Parameterised                                                                                           | Lowest level                              | 90S-90N, Uniform + tropical enhancement        | Hines (1997b)                               |
| SOCOL                                      | Lott and Miller (1997), Lott (1999)           | Parameterized                                                                                           | ~700 hPa                                  | 90S-90N                                        | Hines (1997a,b)                             |
| ULAQ CCM                                   | no OGWD                                       | parameterized (Rayleigh friction)                                                                       |                                           |                                                |                                             |

Table S10: References for physical parameterizations

| Model name                             | Turbulent vertical fluxes, dry convection                                            | Moist convection                                                             | Cloud microphysics                                    |
|----------------------------------------|--------------------------------------------------------------------------------------|------------------------------------------------------------------------------|-------------------------------------------------------|
| ACCESS CCM<br>NIWA-UKCA<br>UMUKCA-UCAM | Hewitt et al. (2011)                                                                 | Hewitt et al. (2011)                                                         | Hewitt et al. (2011)                                  |
| CCSRNIES<br>MIROC3.2                   | Noh and Kim (1999)                                                                   | Arakawa and Schubert (1974) + cloud base mass flux by Pan and Randall (1998) | A simple microphysics scheme, Hasumi and Emori (2004) |
| CESM1 CAM4-chem<br>CESM1 WACCM         |                                                                                      | Hack (shallow) and Zhang and MacFarlane (1995) deep                          | Rasch and Kristjansson (1998)                         |
| CHASER (MIROC-ESM)                     | Mellor & Yamada (1974) lev.2                                                         | Arakawa and Schubert (1974) + cloud base mass flux by Pan and Randall (1998) | Watanabe et al. (2011)<br>Takemura et al. (2005,2012) |
| CMAM                                   | Abdella and McFarlane (1996) for surface fluxes<br>Scinocca et al. (2008) for mixing | Zhang and McFarlane (1995)                                                   |                                                       |
| CNRM-CM 5-3                            | Turbulent: Ricard and Royer (1993) - dry convection Bougeault (1985)                 | Bougeault (1985)                                                             | Ricard and Royer (1993)                               |
| EMAC                                   | Roeckner et al. (2006)                                                               | Tiedtke (1989); Nordeng (1994)                                               | Lohmann and Roeckner (1996)                           |
| GEOSCCM                                | Lock (2000), and Richardson-number scheme of Louis and Geleyn (1982)                 | Moorthi and Suarez (1992), Bacmeister et al. (2006)                          | Bacmeister et al. (2006)                              |
| GFDL-CM3/AM3                           | Donner et al. (2011)                                                                 | Donner et al. (2011)                                                         | Donner et al. (2011)                                  |
| HadGEM3-ES                             | Walters et al. (2014)                                                                | Walters et al. (2014)                                                        | Walters et al. (2014)                                 |
| LMDz-REPROBUS                          | Dufresnes et al. (2013)                                                              | Dufresnes et al. (2013)                                                      | Dufresnes et al. (2013)                               |
| MRI-ESM1r1                             | Yukimoto et al. (2011)                                                               | Yoshimura et al. (2015)                                                      | Yukimoto et al. (2011)                                |
| MOCAGE                                 | Louis et al. (1979)                                                                  | Bechtold et al. (2001)                                                       |                                                       |
| SOCOL                                  | Roeckner et al. (2006)                                                               | Nordeng (1994)                                                               | Lohmann and Roeckner (1996)                           |
| ULAQ CCM                               | Vertical diffusion                                                                   | Grewe et al. (2001)                                                          | Kärcher and Lohmann (2002) [cirrus ice clouds]        |

Table S11: Physical processes continued

| Model name                             | Aerosol microphysics                     | Cloud cover                                                               |
|----------------------------------------|------------------------------------------|---------------------------------------------------------------------------|
| ACCESS CCM<br>NIWA-UKCA<br>UMUKCA-UCAM | Hewitt et al. (2011)                     | Hewitt et al. (2011)                                                      |
| CCSRNIES MIROC3.2                      | None                                     | Le Treut and Li (1991)                                                    |
| CESM1 CAM4-chem<br>CESM1 WACCM         | Tie (2005)                               | Zhang et al. (2003)                                                       |
| CHASER (MIROC-ESM)                     | Takemura et al. (2005,2012)              | Le Treut and Li (1991)                                                    |
| CMAM                                   | N/A                                      | Prognostic cloud cover based on relative humidity (Scinocca et al., 2008) |
| CNRM-CM5-3                             | Aerosols climatology in these simulation | Cloud cover Strati: Ricard and Royer (1993). Conv: Bougeault (1985)       |
| EMAC                                   | N/A                                      | Sundqvist (1978)                                                          |
| GEOSCCM                                | Colarco et al. (2010)                    | Bacmeister et al. (2006)                                                  |
| GFDL-CM3/AM3                           | Donner et al. (2011)                     | Donner et al. (2011)                                                      |
| HadGEM3-ES                             | Walters et al. (2014)                    | Walters et al. (2014)                                                     |
| MRI-ESM1r1                             | Yukimoto et al. (2011)                   | Yukimoto et al. (2011)                                                    |
| LMDz-REPROBUS                          | Szopa et al. (2013)                      | Dufresnes et al. (2013)                                                   |
| SOCOL                                  | N/A                                      | Tompkins (2002)                                                           |
| ULAQ CCM                               | Pitari et al. (2014, 2015a, 2015b)       | MERRA climatology                                                         |

Table S12: Cloud information

| Model name                             | Reference for cloud microphysics                                      |
|----------------------------------------|-----------------------------------------------------------------------|
| ACCESS CCM<br>NIWA-UKCA<br>UMUKCA-UCAM | Wilson et al. (2008)                                                  |
| CCSRNIES MIROC3.2                      | Watanabe et al. (2010), Hasumi and Emori (2004)                       |
| CESM1 CAM4-chem<br>CESM1 WACCM         | Rasch and Kristjansson (1998)                                         |
| CHASER (MIROC-ESM)                     | Watanabe et al. (2010), Hasumi and Emori (2004)                       |
| CMAM                                   | Scinocca et al. (2008)                                                |
| CNRM-CM 5-3                            | Ricard and Royer (1993)                                               |
| EMAC                                   | Lohmann and Roeckner (1996)                                           |
| GEOSCCM                                | Bacmeister et al. (2006)                                              |
| GFDL-CM3/AM3                           | Golaz et al. (2013)                                                   |
| HadGEM3-ES                             | Walters et al. (2014)                                                 |
| LMDz-REPROBUS                          | Dufresnes et al., 2013                                                |
| MRI-ESM1r1                             | Yukimoto et al. (2011)                                                |
| SOCOL                                  | Lohmann and Roeckner (1996)                                           |
| ULAQ CCM                               | Kärcher and Lohmann (2002), Pitari et al. (2015a) [cirrus ice clouds] |

Table S13: Chlorine, bromine, and NMHC source gases, type of chemical scheme, origin of kinetic and photolysis data, handling of methane (PS == prescribed at surface, BP == prescribed in bulk; HA = hemispheric asymmetry consistent with observed asymmetries). See table 2.12 of SPARC CCMVal (2010). F10 = CCl<sub>4</sub>. F11 = CFCl<sub>3</sub>. F12 = CF<sub>2</sub>Cl<sub>2</sub>. F113 = CF<sub>2</sub>ClCFCl<sub>2</sub>. F114 = (CF<sub>2</sub>Cl)<sub>2</sub>. F115 = C<sub>2</sub>F<sub>5</sub>Cl. H21 = CHFCl<sub>2</sub>. H22 = CHF<sub>2</sub>Cl. H123 = CHCl<sub>2</sub>CF<sub>3</sub>. MCF = CH<sub>3</sub>CCl<sub>3</sub>. H141b = CH<sub>3</sub>CFCl<sub>2</sub>. H142b = CH<sub>3</sub>CF<sub>2</sub>Cl. H1211 = CF<sub>2</sub>ClBr. H1301 = CF<sub>3</sub>Br. H1202 = CF<sub>2</sub>Br<sub>2</sub>. H2402 = (CF<sub>2</sub>Br)<sub>2</sub>. MEK = CH<sub>3</sub>C(O)CH<sub>2</sub>CH<sub>3</sub>. OTHC = “other carbon”. BIGALK = “big alkanes”. BIGENE = “big alkenes”.

| Model name                            | Cl source gases                                                                         | Br source gases                                                                                                                                                                              | NMHC source gases                                                                                                                                                                                                                                                                                                                                                                                           | Chemical scheme                                                                                                                                                                                                                                                                                                                        | Origin of kinetics and photolysis data          | Handling of methane              |
|---------------------------------------|-----------------------------------------------------------------------------------------|----------------------------------------------------------------------------------------------------------------------------------------------------------------------------------------------|-------------------------------------------------------------------------------------------------------------------------------------------------------------------------------------------------------------------------------------------------------------------------------------------------------------------------------------------------------------------------------------------------------------|----------------------------------------------------------------------------------------------------------------------------------------------------------------------------------------------------------------------------------------------------------------------------------------------------------------------------------------|-------------------------------------------------|----------------------------------|
| ACCESS CCM<br>HadGEM3-ES<br>NIWA-UKCA | F11, F12<br>(scaled)                                                                    | CH <sub>3</sub> Br (scaled),<br>CH <sub>2</sub> Br <sub>2</sub> , CHBr <sub>3</sub>                                                                                                          | HCHO, C <sub>2</sub> H <sub>6</sub> ,<br>CH <sub>3</sub> CHO, C <sub>3</sub> H <sub>8</sub> , C <sub>5</sub> H <sub>8</sub> ,<br>(CH <sub>3</sub> ) <sub>2</sub> CO                                                                                                                                                                                                                                         | NMVOC-CH <sub>4</sub> -<br>CO-NO <sub>x</sub> -ClO <sub>x</sub> -<br>BrO <sub>x</sub> non-<br>families                                                                                                                                                                                                                                 | various                                         | PS                               |
| CCSRNIES<br>MIROC3.2                  | F11, F12, F113,<br>H22, CH <sub>3</sub> Cl,<br>MCF                                      | H1211, H1301,<br>CH <sub>3</sub> Br, CH <sub>2</sub> Br <sub>2</sub> ,<br>CHBr <sub>3</sub>                                                                                                  | None                                                                                                                                                                                                                                                                                                                                                                                                        | N <sub>2</sub> O-CH <sub>4</sub> -CO-<br>H <sub>2</sub> O-O <sub>x</sub> -HO <sub>x</sub> -<br>NO <sub>x</sub> -CHO <sub>x</sub> -ClO <sub>x</sub> -<br>BrO <sub>x</sub>                                                                                                                                                               | JPL (2011)                                      | PS                               |
| CESM1 CAM4-<br>chem                   | F11, F12, F113,<br>F114, F115,<br>H22, H141b,<br>H142b, MCF,<br>CH <sub>3</sub> Cl, F10 | H1211, H1301,<br>H1202, H2402,<br>CH <sub>3</sub> Br, CH <sub>2</sub> Br <sub>2</sub> ,<br>CHBr <sub>3</sub>                                                                                 | HCHO, Benzene,<br>Xylene, BIGALK,<br>BIGENE, C <sub>2</sub> H <sub>2</sub> , C <sub>2</sub> H <sub>6</sub> ,<br>C <sub>2</sub> H <sub>4</sub> , C <sub>3</sub> H <sub>8</sub> , C <sub>3</sub> H <sub>6</sub> ,<br>CH <sub>3</sub> CHO, C <sub>2</sub> H <sub>4</sub> OH,<br>CH <sub>3</sub> CHO, CH <sub>3</sub> OH,<br>MEK, Toluene,<br>CH <sub>3</sub> CCH <sub>3</sub> , CH <sub>3</sub> COOH,<br>HCOOH | NMVOC-CH <sub>4</sub> -<br>CO-NO <sub>x</sub> -ClO <sub>x</sub> -<br>BrO <sub>x</sub> non-<br>families<br><br>Het chemistry<br>(STS, NAT, ICE)<br>17 reactions                                                                                                                                                                         | Mainly JPL<br>(2011)                            | PS                               |
| CESM1<br>WACCM                        | F11, F12, F113,<br>F114, F115,<br>H22, H141b,<br>H142b, MCF,<br>CH <sub>3</sub> Cl, F10 | H1211, H1301,<br>H1202, H2402,<br>CH <sub>3</sub> Br, CH <sub>2</sub> Br <sub>2</sub> ,<br>CHBr <sub>3</sub>                                                                                 | HCHO, Benzene,<br>Xylene, BIGALK,<br>BIGENE, C <sub>2</sub> H <sub>2</sub> , C <sub>2</sub> H <sub>6</sub> ,<br>C <sub>2</sub> H <sub>4</sub> , C <sub>3</sub> H <sub>8</sub> , C <sub>3</sub> H <sub>6</sub> ,<br>CH <sub>3</sub> CHO, C <sub>2</sub> H <sub>4</sub> OH,<br>CH <sub>3</sub> CHO, CH <sub>3</sub> OH,<br>MEK, Toluene,<br>CH <sub>3</sub> CCH <sub>3</sub> , CH <sub>3</sub> COOH,<br>HCOOH | NMVOC-CH <sub>4</sub> -<br>CO-NO <sub>x</sub> -ClO <sub>x</sub> -<br>BrO <sub>x</sub> non-<br>families<br><br>Het chemistry<br>(STS, NAT, ICE)<br>17 reactions;<br>Ion-neutral<br>chemistry in<br>MLT region                                                                                                                           | Mainly JPL<br>(2011)                            | PS                               |
| CHASER<br>(MIROC-ESM)                 | F11, F12, F113,<br>H22, MCF,<br>CH <sub>3</sub> Cl                                      | CH <sub>3</sub> Br, CHBr <sub>3</sub>                                                                                                                                                        | HCHO, CH <sub>3</sub> OH, C <sub>2</sub> H <sub>6</sub> ,<br>C <sub>2</sub> H <sub>4</sub> , C <sub>3</sub> H <sub>8</sub> , C <sub>3</sub> H <sub>6</sub> ,<br>CH <sub>3</sub> CHO, C <sub>3</sub> H <sub>8</sub> ,<br>terpenes, (CH <sub>3</sub> ) <sub>2</sub> CO, &<br>a lumped species                                                                                                                 | NMVOC-CH <sub>4</sub> -<br>CO-NO <sub>x</sub> -ClO <sub>x</sub> -<br>BrO <sub>x</sub>                                                                                                                                                                                                                                                  | various                                         | Prognostic<br>ally<br>calculated |
| CMAM                                  | F11, F12, F10,<br>MCF, H22,<br>CH <sub>3</sub> Cl                                       | CH <sub>3</sub> Br, CH <sub>3</sub> Br <sub>2</sub> ,<br>CHBr <sub>3</sub>                                                                                                                   | N/A                                                                                                                                                                                                                                                                                                                                                                                                         | CH <sub>4</sub> -CO-NO <sub>x</sub> -<br>ClO <sub>x</sub> -BrO <sub>x</sub>                                                                                                                                                                                                                                                            | JPL (2011)                                      | PS                               |
| CNRM-CM5-3                            | F10, F11, F12,<br>F113, MCF,<br>CH <sub>3</sub> Cl, H22                                 | CH <sub>3</sub> Br, H1211,<br>H1301                                                                                                                                                          | N/A                                                                                                                                                                                                                                                                                                                                                                                                         | REPROBUS<br>Lefèvre (1994)                                                                                                                                                                                                                                                                                                             | JPL (2011)                                      | PS                               |
| EMAC                                  | F11, F12, MCF,<br>F10, CH <sub>3</sub> Cl, sea<br>salt aerosol                          | CHCl <sub>3</sub> Br,<br>CHClBr <sub>2</sub> ,<br>CH <sub>2</sub> ClBr,<br>CH <sub>2</sub> Br <sub>2</sub> , CHBr <sub>3</sub> ,<br>CH <sub>3</sub> Br, H1211,<br>H1301, sea salt<br>aerosol | C <sub>2</sub> H <sub>4</sub> ; C <sub>2</sub> H <sub>6</sub> ; C <sub>3</sub> H <sub>6</sub> ;<br>C <sub>3</sub> H <sub>8</sub> ; C <sub>5</sub> H <sub>8</sub> ; C <sub>4</sub> H <sub>10</sub> ;<br>CH <sub>3</sub> CHO; (CH <sub>3</sub> ) <sub>2</sub> CO;<br>CH <sub>3</sub> CO <sub>2</sub> H; CH <sub>3</sub> OH;<br>HCHO; HCOOH;<br>MEK                                                            | O <sub>3</sub> ; CH <sub>4</sub> ; NO <sub>x</sub> ;<br>alkanes and<br>alkenes up to C <sub>4</sub> ;<br>Br; Cl; NMHCs;<br>C <sub>3</sub> H <sub>8</sub> ;<br>heterogeneous<br>reactions of N <sub>2</sub> O <sub>5</sub> ,<br>halogen nitrates<br>(ClNO <sub>3</sub> , BrNO <sub>3</sub> )<br>and hypohalous<br>acids (HOCl,<br>HOBr) | JPL (2011)<br>for kinetics<br>and<br>photolysis | HA with<br>seasonal<br>cycle     |
| GEOSCCM                               | F10, F11, F12,<br>F113, MCF,<br>CH <sub>3</sub> Cl, H22,<br>H142b, H141b                | CH <sub>3</sub> Br, H1301,<br>H1211, H2402                                                                                                                                                   | C <sub>2</sub> H <sub>6</sub> , C <sub>3</sub> H <sub>6</sub> + ≥ C <sub>3</sub><br>alkenes, CH <sub>3</sub> CHO, ≥<br>C <sub>4</sub> alkanes,<br>CH <sub>3</sub> C(O)CH <sub>3</sub> , C <sub>3</sub> H <sub>8</sub> ,<br>CH <sub>2</sub> O, C <sub>5</sub> H <sub>8</sub> , CH <sub>3</sub> OH,                                                                                                           | NMVOC-CH <sub>4</sub> -<br>CO-NO <sub>x</sub> -ClO <sub>x</sub> -<br>BrO <sub>x</sub> non-<br>families                                                                                                                                                                                                                                 | JPL (2011)<br>for kinetics<br>and<br>photolysis | PS                               |

|               |                                                                                        |                                                                                               |                                                                                                                                                                                                                                                                                                                                  |                                                                                                                                                                   |                                                                                       |                       |
|---------------|----------------------------------------------------------------------------------------|-----------------------------------------------------------------------------------------------|----------------------------------------------------------------------------------------------------------------------------------------------------------------------------------------------------------------------------------------------------------------------------------------------------------------------------------|-------------------------------------------------------------------------------------------------------------------------------------------------------------------|---------------------------------------------------------------------------------------|-----------------------|
|               |                                                                                        |                                                                                               | C <sub>2</sub> H <sub>5</sub> OH, RC(O)R (> C <sub>3</sub> ketones)                                                                                                                                                                                                                                                              |                                                                                                                                                                   |                                                                                       |                       |
| GFDL-AM3      | F11, F12, CH <sub>3</sub> Cl, F10, MCF, H22                                            | CH <sub>3</sub> Br, H1211, H1301                                                              | C <sub>2</sub> H <sub>4</sub> , C <sub>2</sub> H <sub>6</sub> , C <sub>3</sub> H <sub>6</sub> , C <sub>3</sub> H <sub>8</sub> , CH <sub>3</sub> OH, HCHO, (CH <sub>3</sub> ) <sub>2</sub> CO, C <sub>2</sub> H <sub>5</sub> OH, C <sub>4</sub> H <sub>10</sub> , C <sub>5</sub> H <sub>8</sub> , C <sub>10</sub> H <sub>16</sub> | NMVOC-CH <sub>4</sub> -CO-NO <sub>x</sub> -ClO <sub>x</sub> -BrO <sub>x</sub>                                                                                     | Sander et al. (2006)                                                                  | PS                    |
| LMDz-REPROBUS | F11, F12, F113, F10, MCF, CH <sub>3</sub> Cl, H22                                      | CH <sub>3</sub> Br, H1211, H1301                                                              | None                                                                                                                                                                                                                                                                                                                             | CH <sub>4</sub> -CO-NO <sub>x</sub> -ClO <sub>x</sub> -BrO <sub>x</sub>                                                                                           | Latest JPL recommendations                                                            | PS                    |
| MRI-ESM1r1    | F10, F11, F12, CH <sub>3</sub> Cl                                                      | CH <sub>3</sub> Br, H1211, H1301                                                              | C <sub>2</sub> H <sub>4</sub> , C <sub>2</sub> H <sub>6</sub> , C <sub>3</sub> H <sub>6</sub> , C <sub>3</sub> H <sub>8</sub> , HCHO, C <sub>5</sub> H <sub>8</sub> , (CH <sub>3</sub> ) <sub>2</sub> CO, CH <sub>3</sub> CHO, C <sub>4</sub> H <sub>10</sub> , C <sub>10</sub> H <sub>16</sub>                                  | N <sub>2</sub> O-NMVOC-CH <sub>4</sub> -CO-H <sub>2</sub> O-O <sub>x</sub> -HO <sub>x</sub> -NO <sub>x</sub> -ClO <sub>x</sub> -BrO <sub>x</sub> -SO <sub>x</sub> | kinetics: JPL (2011) Atkinson et al. (2004, 2006)<br>photolysis: Sander et al. (2006) | PS                    |
| MOCAGE        | F11, F12, F113, H22, F10, MCF, CH <sub>3</sub> Cl                                      | CH <sub>3</sub> Br, H1211, H1301                                                              | HCHO, C <sub>2</sub> H <sub>4</sub> , C <sub>2</sub> H <sub>6</sub> , C <sub>3</sub> H <sub>6</sub> , C <sub>3</sub> H <sub>8</sub> , butanes and higher alkanes, butene and higher alkenes, benzene, toluene, xylene, ketones, acids, alcohols, C <sub>5</sub> H <sub>8</sub>                                                   | N <sub>2</sub> O-NMVOC-CH <sub>4</sub> -CO-H <sub>2</sub> O-O <sub>x</sub> -HO <sub>x</sub> -NO <sub>x</sub> -ClO <sub>x</sub> -BrO <sub>x</sub> -SO <sub>x</sub> | kinetics : JPL (2011),<br>photolysis: tabulation from                                 | PS                    |
| SOCOL         | F11, F12, F113, F114, F115, F10, MCF, H22, H141B, H142B, CH <sub>3</sub> Cl, H21, H123 | CHBr <sub>3</sub> , CH <sub>2</sub> Br <sub>2</sub> , CH <sub>3</sub> Br, H1211, H1301, H2402 | HCHO, C <sub>5</sub> H <sub>8</sub>                                                                                                                                                                                                                                                                                              | C <sub>5</sub> H <sub>8</sub> -CH <sub>4</sub> -CO-NO <sub>x</sub> -ClO <sub>x</sub> -BrO <sub>x</sub> (MEZON/MIM1)                                               | kinetics: JPL (2011)<br>photolysis: JPL (2011)                                        | PS                    |
| TOMCAT        | CH <sub>3</sub> Cl, F11, F12, F113, F114, F115, F10, MCF, H22, H141b, H142b            | CH <sub>3</sub> Br, H1211, H1301, CHBr <sub>3</sub> , CH <sub>2</sub> Br <sub>2</sub>         |                                                                                                                                                                                                                                                                                                                                  | O <sub>x</sub> -ClO <sub>x</sub> -BrO <sub>x</sub> -NO <sub>x</sub> -HO <sub>x</sub> -CHO <sub>x</sub> Families                                                   | JPL(2011)                                                                             | PS                    |
| ULAQ CCM      | CH <sub>3</sub> Cl, F11, F12, F113, F114, F115, F10, MCF, H22, H141b, H142b            | CH <sub>3</sub> Br, H1211, H1301, H2402                                                       | C <sub>2</sub> H <sub>6</sub> , C <sub>2</sub> H <sub>4</sub> , C <sub>3</sub> H <sub>6</sub> , C <sub>5</sub> H <sub>8</sub> , C <sub>10</sub> H <sub>16</sub> , OTHC                                                                                                                                                           | O <sub>x</sub> -ClO <sub>x</sub> -BrO <sub>x</sub> -NO <sub>x</sub> -SO <sub>x</sub> -HO <sub>x</sub> -CHO <sub>x</sub> families                                  | JPL (2011)                                                                            | HA, no seasonal cycle |
| UMSLIMCAT     | F11, F12 (scaled)                                                                      | CH <sub>3</sub> Br (scaled)                                                                   |                                                                                                                                                                                                                                                                                                                                  | O <sub>x</sub> -ClO <sub>x</sub> -BrO <sub>x</sub> -NO <sub>x</sub> -SO <sub>x</sub> -HO <sub>x</sub> -CHO <sub>x</sub> families                                  | JPL(2011)                                                                             | PS                    |
| UMUKCA-UCAM   | F11, F12, F113, F10, MCF, CH <sub>3</sub> Cl, H22                                      | CH <sub>3</sub> Br, H1211, H1301, CH <sub>2</sub> Br <sub>2</sub> , CHBr <sub>3</sub>         | HCHO                                                                                                                                                                                                                                                                                                                             | CH <sub>4</sub> -CO-NO <sub>x</sub> -ClO <sub>x</sub> -BrO <sub>x</sub> non-families                                                                              | various                                                                               | PS                    |

Table S14: Interactive biogenic emissions by species, with reference for interactive emissions. NI = non-interactive. Please add columns as required for other species. Models not listed here do not represent any interactive biogenic emissions.

| Model name                                                  | NO                         | DMS                                              | (CH <sub>3</sub> ) <sub>2</sub> CO | C <sub>5</sub> H <sub>8</sub>                                                              | C <sub>2</sub> H <sub>6</sub> | (other species)                                                                                                                                                                                                                                                                                                                                        |
|-------------------------------------------------------------|----------------------------|--------------------------------------------------|------------------------------------|--------------------------------------------------------------------------------------------|-------------------------------|--------------------------------------------------------------------------------------------------------------------------------------------------------------------------------------------------------------------------------------------------------------------------------------------------------------------------------------------------------|
| ACCESS<br>CCM<br>HadGEM3-ES<br>NIWA-UKCA<br>UMUKCA-<br>UCAM | NI                         | Wanninkhof<br>(1992)                             | NI                                 | NI                                                                                         | NI                            |                                                                                                                                                                                                                                                                                                                                                        |
| CESM1<br>CAM4-chem<br>CESM1<br>WACCM                        | NI                         | NI                                               | MEGAN2.1                           | n.a.                                                                                       | MEGAN2.1                      | Isoprene,<br>C <sub>10</sub> H <sub>16</sub> ,<br>CH <sub>3</sub> OH,<br>C <sub>2</sub> H <sub>5</sub> OH,<br>CH <sub>2</sub> O,<br>CH <sub>3</sub> CHO,<br>CH <sub>3</sub> COOH,<br>HCOOH,<br>HCN, CO,<br>C <sub>2</sub> H <sub>4</sub> , C <sub>2</sub> H <sub>8</sub> ,<br>C <sub>3</sub> H <sub>6</sub> ,<br>BIGALK,<br>BIGENE,<br>MEK,<br>TOLUENE |
| EMAC                                                        | Yienger and<br>Levy (1995) | Pozzer et al.<br>(2006);<br>Wanninkhof<br>(1992) | None                               | ocean: similar<br>to DMS;<br>land: Kerkweg<br>et al. (2006b);<br>Guenther et al.<br>(1995) | None                          | CH <sub>3</sub> OH<br>(similar to<br>DMS)                                                                                                                                                                                                                                                                                                              |
| GEOSCCM                                                     | Yienger and<br>Levy (1995) | NI                                               | NI                                 | MEGAN<br>Guenther et al.<br>(1999)                                                         | NI                            | C <sub>3</sub> H <sub>6</sub> : scaled<br>from isoprene;<br>CO: from<br>monoterpenes<br>and methanol                                                                                                                                                                                                                                                   |
| GFDL-AM3                                                    | NI                         | Chin et al.<br>(2002)                            | NI                                 | MEGAN2.1                                                                                   | NI                            |                                                                                                                                                                                                                                                                                                                                                        |
| GFDL-CM3                                                    | NI                         | Chin et al.<br>(2002)                            | NI                                 | NI                                                                                         | NI                            |                                                                                                                                                                                                                                                                                                                                                        |
| MRI-ESM1r1                                                  | NI                         | Yukimoto et<br>al. (2011)                        | NI                                 | NI                                                                                         | NI                            |                                                                                                                                                                                                                                                                                                                                                        |
| ULAQ CCM                                                    | NI                         | NI                                               | N/A                                | NI                                                                                         | NI                            | C <sub>10</sub> H <sub>16</sub> (NI)                                                                                                                                                                                                                                                                                                                   |

Table S15: Details of lumping, usage of emissions beyond the recommendation (e.g. natural, coupled emissions, e.g. ocean CO, ocean DMS).

| Model name                     | Lumping                                                                                                                                                                                                                                                                                                  | Coupled emissions                                                                                                                                                                 | Comments                                                                                                                                                               |
|--------------------------------|----------------------------------------------------------------------------------------------------------------------------------------------------------------------------------------------------------------------------------------------------------------------------------------------------------|-----------------------------------------------------------------------------------------------------------------------------------------------------------------------------------|------------------------------------------------------------------------------------------------------------------------------------------------------------------------|
| ACCESS CCM<br>NIWA-UKCA        | NMVOC emissions are distributed across NMHC source gases.                                                                                                                                                                                                                                                | DMS: SS concentrations prescribed<br>No other coupled emissions..                                                                                                                 | O'Connor et al. (2014)                                                                                                                                                 |
| CESM1 CAM4-chem<br>CESM1 WACCM | Alkenes and alkanes are lumped for C>3 (BIGENE and BIGALK) , some VOCs are lumped (MEK), others are explicit: CH <sub>2</sub> O, CH <sub>3</sub> CHO, (CH <sub>3</sub> ) <sub>2</sub> CO, CH <sub>3</sub> OH, C <sub>2</sub> H <sub>5</sub> OH                                                           | SeaSalt, Dust, Biogenic emissions                                                                                                                                                 |                                                                                                                                                                        |
| CHASER<br>(MIROC-ESM)          | NMVOCs emissions are distributed across NMHC source gases.                                                                                                                                                                                                                                               | BVOCs emissions are off-line coupled with the VISIT model                                                                                                                         | Ito (2013)                                                                                                                                                             |
| CMAM                           |                                                                                                                                                                                                                                                                                                          |                                                                                                                                                                                   | Additional 250 Tg-CO/year emissions to account for isoprene oxidation, distributed as Guenther et al. (1995) isoprene emissions. Additional 160 Tg-CO/year from soils. |
| EMAC                           | NMVOC emissions are distributed among NMHC source gases                                                                                                                                                                                                                                                  | see on-line emissions (DMS, CH <sub>3</sub> OH, C <sub>3</sub> H <sub>8</sub> from ocean; Br and Cl from sea salt); volcanic SO <sub>2</sub> ; terrestrial DMS; NH <sub>3</sub> ; |                                                                                                                                                                        |
| GEOSCCM                        | NMVOC emissions: MEK + >C3 ketones, propene + >= C3 alkenes, C <sub>2</sub> H <sub>6</sub> , C <sub>3</sub> H <sub>8</sub> , >= C4 alkanes, CH <sub>2</sub> O, acetaldehyde                                                                                                                              | Dust, Sea Salt                                                                                                                                                                    |                                                                                                                                                                        |
| HadGEM3-ES                     | C <sub>2</sub> H <sub>2</sub> and C <sub>2</sub> H <sub>4</sub> lumped with C <sub>2</sub> H <sub>6</sub> ems. C <sub>3</sub> H <sub>6</sub> lumped with C <sub>3</sub> H <sub>8</sub> ems. Ocean CO, HCHO, and CH <sub>3</sub> CHO ems included.                                                        | DMS: SS concentrations prescribed<br>No other coupled emissions. Ocean DMS included (see Kettle et al., 1999, and Wanninkhof, 1992)                                               | O'Connor et al. (2014), Wanninkhof (1992), Kettle et al. (1999).                                                                                                       |
| MRI-ESM1r1                     | NMVOC emissions are distributed across NMHC source gases.                                                                                                                                                                                                                                                | Dust, SSALT, DMS                                                                                                                                                                  | Yukimoto et al. (2011)<br>Deushi and Shibata (2011)                                                                                                                    |
| MOCAGE                         | non lumped species: C <sub>2</sub> H <sub>6</sub> , C <sub>2</sub> H <sub>4</sub> , C <sub>3</sub> H <sub>6</sub> , C <sub>5</sub> H <sub>8</sub> , C <sub>7</sub> H <sub>8</sub> , C <sub>8</sub> H <sub>10</sub> , $\alpha$ -pinene<br>Other NMVOC emissions are distributed across NMHC source gases. |                                                                                                                                                                                   |                                                                                                                                                                        |
| SOCOL                          | N/A                                                                                                                                                                                                                                                                                                      | N/A                                                                                                                                                                               | N/A                                                                                                                                                                    |
| ULAQ CCM                       | NMVOC lumped species for VOCs other than C <sub>2</sub> H <sub>6</sub> , C <sub>2</sub> H <sub>4</sub> , C <sub>3</sub> H <sub>6</sub> , C <sub>3</sub> H <sub>8</sub> , C <sub>10</sub> H <sub>16</sub>                                                                                                 | N/A                                                                                                                                                                               | Müller and Brasseur (1995)                                                                                                                                             |

Table S16: Species with aircraft emissions, lightning NO<sub>x</sub> reference, species with wet and dry deposition. Cf table 2.13 of SPARC CCMVal (2010). BC = black carbon. For other species' definitions the readers are referred to the corresponding individual model descriptions.

| Model name                  | Aircraft emission        | Lightning NO <sub>x</sub>                      | Wet deposition                                                                                                                                                                                                                                                                                                                                                                                                                                                                                                                                                                                                                                                                                                                                                                      | Dry Deposition                                                                                                                                                                                                                                                                                                                                                                                                                                                                                                                                                                                                                                                                                                                                                                                                                                                                  | Comments |
|-----------------------------|--------------------------|------------------------------------------------|-------------------------------------------------------------------------------------------------------------------------------------------------------------------------------------------------------------------------------------------------------------------------------------------------------------------------------------------------------------------------------------------------------------------------------------------------------------------------------------------------------------------------------------------------------------------------------------------------------------------------------------------------------------------------------------------------------------------------------------------------------------------------------------|---------------------------------------------------------------------------------------------------------------------------------------------------------------------------------------------------------------------------------------------------------------------------------------------------------------------------------------------------------------------------------------------------------------------------------------------------------------------------------------------------------------------------------------------------------------------------------------------------------------------------------------------------------------------------------------------------------------------------------------------------------------------------------------------------------------------------------------------------------------------------------|----------|
| ACCESS CCM NIWA-UKCA        | NO                       | Price and Rind (1992)                          | NO <sub>3</sub> , N <sub>2</sub> O <sub>5</sub> , HO <sub>2</sub> NO <sub>2</sub> , HNO <sub>3</sub> , HO <sub>2</sub> , H <sub>2</sub> O <sub>2</sub> , HCHO, CH <sub>3</sub> O <sub>2</sub> , CH <sub>3</sub> OOH, HONO, C <sub>2</sub> H <sub>5</sub> OOH, n-C <sub>3</sub> H <sub>7</sub> OOH, i-C <sub>3</sub> H <sub>7</sub> OOH, CH <sub>3</sub> COCH <sub>2</sub> OOH, ISOOH, ISON, MACROOH, HACET, MGLY, HCOOH, CH <sub>3</sub> CO <sub>3</sub> H, CH <sub>3</sub> CO <sub>2</sub> H, CH <sub>3</sub> OH                                                                                                                                                                                                                                                                   | O <sub>3</sub> , NO, NO <sub>3</sub> , NO <sub>2</sub> , N <sub>2</sub> O <sub>5</sub> , HNO <sub>4</sub> , HNO <sub>3</sub> , H <sub>2</sub> O, CO, HCHO, CH <sub>3</sub> OOH, HONO, C <sub>2</sub> H <sub>5</sub> OOH, CH <sub>3</sub> CHO, PAN, n-C <sub>3</sub> H <sub>7</sub> OOH, i-C <sub>3</sub> H <sub>7</sub> OOH, C <sub>2</sub> H <sub>5</sub> CHO, CH <sub>3</sub> COCH <sub>2</sub> OOH, PPAN, ISOOH, ISON, MACR, MACROOH, MPAN, HACET, MGLY, NALD, HCOOH, CH <sub>3</sub> CO <sub>3</sub> H, CH <sub>3</sub> CO <sub>2</sub> H, CH <sub>3</sub> OH                                                                                                                                                                                                                                                                                                               |          |
| CCSRNIES MIROC3.2           | None                     | None                                           | HNO <sub>3</sub> , HCl, HBr                                                                                                                                                                                                                                                                                                                                                                                                                                                                                                                                                                                                                                                                                                                                                         | O <sub>3</sub> , H <sub>2</sub> O <sub>2</sub> , NO, NO <sub>2</sub> , HNO <sub>3</sub> , HNO <sub>4</sub> , N <sub>2</sub> O <sub>5</sub> , HCl                                                                                                                                                                                                                                                                                                                                                                                                                                                                                                                                                                                                                                                                                                                                |          |
| CESM1 CAM4-chem CESM1 WACCM | BC, NO, SO <sub>2</sub>  | Price and Rind (1992)                          | ALKOOH, BrONO <sub>2</sub> , C <sub>2</sub> H <sub>5</sub> OH, C <sub>2</sub> H <sub>5</sub> OOH, C <sub>3</sub> H <sub>7</sub> OOH, CH <sub>2</sub> O, CH <sub>3</sub> CHO, CH <sub>3</sub> CN, CH <sub>3</sub> COCHO, CH <sub>3</sub> COOH, CH <sub>3</sub> COOOH, CH <sub>3</sub> OH, CH <sub>3</sub> OOH, CLONO <sub>2</sub> , EOOH, GLYALD, H <sub>2</sub> O <sub>2</sub> , HBr, HCl, HCN, HCOOH, HNO <sub>3</sub> , HO <sub>2</sub> NO <sub>2</sub> , HOBr, HOCl, HYAC, HYDRALD, ISOPNO <sub>3</sub> , ISOPOOH, MACR, MACROOH, MEKOOH, MVK, NH <sub>3</sub> , NH <sub>50W</sub> , ONIT, ONITR, POOH, ROOH, SO <sub>2</sub> , SO <sub>2t</sub> , SOAG, TERPOOH, TOLOOH, XOOH, BC, Dust, NH <sub>4</sub> , NH <sub>4</sub> NO <sub>3</sub> , OC, SO <sub>4</sub> , SOA, SeaSalt | ALKOOH, C <sub>2</sub> H <sub>5</sub> OH, C <sub>2</sub> H <sub>5</sub> OOH, C <sub>3</sub> H <sub>7</sub> OOH, BC, CH <sub>2</sub> O, CH <sub>3</sub> CHO, CH <sub>3</sub> CN, (CH <sub>3</sub> ) <sub>2</sub> CO, CH <sub>3</sub> COCHO, CH <sub>3</sub> COOH, CH <sub>3</sub> COOOH, CH <sub>3</sub> OH, CH <sub>3</sub> OOH, CO, EOOH, GLYALD, H <sub>2</sub> O <sub>2</sub> , HCN, HCOOH, HNO <sub>3</sub> , HO <sub>2</sub> NO <sub>2</sub> , HYAC, HYDRALD, ISOPOOH, MACROOH, MEKOOH, MPAN, NH <sub>3</sub> , NH <sub>4</sub> , NH <sub>4</sub> NO <sub>3</sub> , NO, NO <sub>2</sub> , O <sub>3</sub> , OC, ONIT, ONITR, PAN, POOH, ROOH, SO <sub>2</sub> , SO <sub>4</sub> , SOA, SOAG, TERPOOH, TOLOOH, XOOH                                                                                                                                                          |          |
| CHASER (MIROC-ESM)          | NO, SO <sub>2</sub> , BC | Price and Rind (1992)                          | N <sub>2</sub> O <sub>5</sub> , HO <sub>2</sub> NO <sub>2</sub> , HNO <sub>3</sub> , H <sub>2</sub> O <sub>2</sub> , HCHO, CH <sub>3</sub> CHO, CH <sub>3</sub> OOH, C <sub>2</sub> H <sub>5</sub> OOH, C <sub>3</sub> H <sub>7</sub> OOH, CH <sub>3</sub> COOOH, ISOOH, ISON, MACROOH, HACET, MGLY, CH <sub>3</sub> OH, SO <sub>2</sub> , SO <sub>4</sub> , NH <sub>3</sub> , NH <sub>4</sub> , ClONO <sub>2</sub> , HCl, BrONO <sub>2</sub> , HOBr, HBr, BC/OC, dust                                                                                                                                                                                                                                                                                                              | O <sub>3</sub> , NO, NO <sub>2</sub> , NO <sub>3</sub> , N <sub>2</sub> O <sub>5</sub> , HNO <sub>3</sub> , HNO <sub>4</sub> , H <sub>2</sub> O <sub>2</sub> , CO, C <sub>2</sub> H <sub>6</sub> , C <sub>3</sub> H <sub>8</sub> , C <sub>2</sub> H <sub>4</sub> , C <sub>3</sub> H <sub>6</sub> , ONMV, C <sub>5</sub> H <sub>8</sub> , C <sub>10</sub> H <sub>16</sub> , CH <sub>3</sub> COCH <sub>3</sub> , CH <sub>2</sub> O, CH <sub>3</sub> CHO, CH <sub>3</sub> OH, NALD, MGLY, HACET, MACR, PAN, MPAN, ISON, CH <sub>3</sub> OOH, C <sub>2</sub> H <sub>5</sub> OOH, C <sub>3</sub> H <sub>7</sub> OOH, ISOOH, HOROOH, CH <sub>3</sub> COOOH, MACROOH, O <sub>3</sub> S, SO <sub>2</sub> , DMS, SO <sub>4</sub> , NH <sub>3</sub> , NH <sub>4</sub> , OCS, ClO <sub>x</sub> , ClONO <sub>2</sub> , BrO <sub>x</sub> , BrONO <sub>2</sub> , HOBr, HBr, BrCl, BC/OC, dust |          |
| CMAM                        | NO                       | based on updraft mass flux scheme of Allen and | HNO <sub>3</sub> , HNO <sub>4</sub> , H <sub>2</sub> O <sub>2</sub> , HCHO, CH <sub>3</sub> OOH, HCl, HBr                                                                                                                                                                                                                                                                                                                                                                                                                                                                                                                                                                                                                                                                           | O <sub>3</sub> , NO <sub>2</sub> , HNO <sub>3</sub> , H <sub>2</sub> O <sub>2</sub> , HCHO, CH <sub>3</sub> OOH                                                                                                                                                                                                                                                                                                                                                                                                                                                                                                                                                                                                                                                                                                                                                                 |          |



|              |                |                                                   |                                                                                                                                                                                                                                                                                                                                                                                                                                                                                                                                                                                                                                                                                                                                                                                                                      |                                                                                                                                                                                                                                                                                                                                                                                                                                                                                                                                                                                                                                                                                                                                                                                                                                                                                                                                                                                                                                                                                                                                                      |                                                                                              |
|--------------|----------------|---------------------------------------------------|----------------------------------------------------------------------------------------------------------------------------------------------------------------------------------------------------------------------------------------------------------------------------------------------------------------------------------------------------------------------------------------------------------------------------------------------------------------------------------------------------------------------------------------------------------------------------------------------------------------------------------------------------------------------------------------------------------------------------------------------------------------------------------------------------------------------|------------------------------------------------------------------------------------------------------------------------------------------------------------------------------------------------------------------------------------------------------------------------------------------------------------------------------------------------------------------------------------------------------------------------------------------------------------------------------------------------------------------------------------------------------------------------------------------------------------------------------------------------------------------------------------------------------------------------------------------------------------------------------------------------------------------------------------------------------------------------------------------------------------------------------------------------------------------------------------------------------------------------------------------------------------------------------------------------------------------------------------------------------|----------------------------------------------------------------------------------------------|
|              |                | Pickering (2002)                                  |                                                                                                                                                                                                                                                                                                                                                                                                                                                                                                                                                                                                                                                                                                                                                                                                                      |                                                                                                                                                                                                                                                                                                                                                                                                                                                                                                                                                                                                                                                                                                                                                                                                                                                                                                                                                                                                                                                                                                                                                      |                                                                                              |
| CNRM-CM 5-3  | NI             | NI                                                | NI                                                                                                                                                                                                                                                                                                                                                                                                                                                                                                                                                                                                                                                                                                                                                                                                                   | NI                                                                                                                                                                                                                                                                                                                                                                                                                                                                                                                                                                                                                                                                                                                                                                                                                                                                                                                                                                                                                                                                                                                                                   | Relaxation up to 560 hPa to evolving ground values (tau=7 days)                              |
| EMAC         | NO             | Grewe et al. (2001)                               | CH <sub>3</sub> CHO; CH <sub>3</sub> CO <sub>2</sub> H; (CH <sub>3</sub> ) <sub>2</sub> CO; CH <sub>3</sub> COO <sup>-</sup> ; CH <sub>3</sub> O <sub>2</sub> ; CH <sub>3</sub> OH; CH <sub>3</sub> OOH; Cl <sup>-</sup> ; CO <sub>2</sub> ; <sup>210</sup> Pb; H <sub>2</sub> O <sub>2</sub> ; HCHO; HCl; HCO <sub>3</sub> <sup>-</sup> ; HCOOH; HCOO <sup>-</sup> ; HNO <sub>3</sub> ; HNO <sub>4</sub> ; HO <sub>2</sub> ; HONO; H <sup>+</sup> ; HSO <sub>3</sub> <sup>-</sup> ; HSO <sub>4</sub> <sup>-</sup> ; NH <sub>3</sub> ; NH <sub>4</sub> <sup>+</sup> ; NO <sub>2</sub> ; NO <sub>2</sub> <sup>-</sup> ; NO <sub>3</sub> <sup>-</sup> ; NO <sub>4</sub> <sup>-</sup> ; NO; O <sub>3</sub> ; OH; OH <sup>-</sup> ; PAN; SO <sub>2</sub> ; SO <sub>3</sub> <sup>2-</sup> ; SO <sub>4</sub> <sup>2-</sup> | ACETOL; BIACET; Br <sub>2</sub> ; BrCl; BrNO <sub>3</sub> ; C <sub>2</sub> H <sub>5</sub> OOH; C <sub>5</sub> H <sub>8</sub> ; CH <sub>2</sub> Br <sub>2</sub> ; CH <sub>2</sub> ClBr; CH <sub>3</sub> Br; CH <sub>3</sub> CHO; CH <sub>3</sub> Cl; CH <sub>3</sub> CO <sub>2</sub> H; CH <sub>3</sub> CO <sub>3</sub> H; (CH <sub>3</sub> ) <sub>2</sub> CO; CH <sub>3</sub> OH; CH <sub>3</sub> OOH; CH <sub>3</sub> SO <sub>3</sub> H; CHBr <sub>3</sub> ; CHCl <sub>2</sub> Br; CHClBr <sub>2</sub> ; Cl <sub>2</sub> ; ClNO <sub>3</sub> ; DMSO; H <sub>2</sub> O <sub>2</sub> ; H <sub>2</sub> SO <sub>4</sub> ; HBr; HCHO; HCl; HCOOH; HNO <sub>3</sub> ; HNO <sub>4</sub> ; HOBr; HOCl; HONO; HYPERACET; i-C <sub>3</sub> H <sub>7</sub> OOH; ISON; ISOOH; l-C <sub>4</sub> H <sub>9</sub> OOH; l-MEKOOH; MEK; MGLYOX; MPAN; MVK; N <sub>2</sub> O <sub>5</sub> ; NH <sub>3</sub> ; NH <sub>50</sub> W; NO; NO <sub>2</sub> ; NO <sub>3</sub> ; O <sub>3</sub> ; PAN; <sup>210</sup> Pb; SO <sub>2</sub> ; H <sup>+</sup> (cs); NO <sub>3</sub> (cs); SO <sub>4res</sub> (cs); Cl <sub>res</sub> (cs); NH <sub>4</sub> <sup>+</sup> res(cs); | (cs)=coarse mode aerosol; res = residual;                                                    |
| GEOSCCM      | NO             | D. Allen - tied to model meteorology              | CH <sub>2</sub> O, HONO, HNO <sub>3</sub> , HNO <sub>4</sub> , HO <sub>2</sub> , H <sub>2</sub> O <sub>2</sub> , MP, NO <sub>2</sub> , NO <sub>3</sub> , N <sub>2</sub> O <sub>5</sub> , O <sub>x</sub> , Br, BrCl, BrONO <sub>2</sub> , HBr, HOBr, ClO, ClONO <sub>2</sub> , HCl, HOCl, PAN, PMN, PPN, R <sub>4</sub> N <sub>2</sub> , dust, sea salt, BC, OC, SO <sub>2</sub> , SO <sub>4</sub>                                                                                                                                                                                                                                                                                                                                                                                                                    | CH <sub>2</sub> O, HONO, HNO <sub>3</sub> , HNO <sub>4</sub> , HO <sub>2</sub> , H <sub>2</sub> O <sub>2</sub> , MP, NO <sub>2</sub> , NO <sub>3</sub> , N <sub>2</sub> O <sub>5</sub> , O <sub>x</sub> , Br, BrCl, BrONO <sub>2</sub> , HBr, HOBr, ClO, ClONO <sub>2</sub> , HCl, HOCl, PAN, PMN, PPN, R <sub>4</sub> N <sub>2</sub> , dust, sea salt, BC, OC, SO <sub>2</sub> , SO <sub>4</sub>                                                                                                                                                                                                                                                                                                                                                                                                                                                                                                                                                                                                                                                                                                                                                    |                                                                                              |
| GFDL-CM3/AM3 | NO<br>BC<br>OM | Tied to model meteorology                         | HNO <sub>3</sub> , HO <sub>2</sub> NO <sub>2</sub> , CH <sub>2</sub> O, H <sub>2</sub> O <sub>2</sub> , CH <sub>3</sub> CHO, POOH, CH <sub>3</sub> COOOH, ONIT, MVK, MACR, MACROOH, C <sub>2</sub> H <sub>5</sub> OOH, C <sub>3</sub> H <sub>7</sub> OOH, ROOH, CH <sub>3</sub> OH, C <sub>2</sub> H <sub>5</sub> OH, GLYALD, HYAC, HYDRALD, (CH <sub>3</sub> ) <sub>2</sub> CO, ONITR, XOOH, ISOPOOH, SO <sub>2</sub> , SO <sub>4</sub> , NH <sub>3</sub> , NH <sub>4</sub> NO <sub>3</sub> , SOA, DUST, BC, OC, SSALT                                                                                                                                                                                                                                                                                              | O <sub>3</sub> , NO, NO <sub>2</sub> , HNO <sub>3</sub> , HO <sub>2</sub> NO <sub>2</sub> , CH <sub>4</sub> , CH <sub>3</sub> OOH, CH <sub>2</sub> O, CO, H <sub>2</sub> O <sub>2</sub> , CH <sub>3</sub> CHO, CH <sub>3</sub> COOOH, ONIT, MPAN, MVK, MACR, MACRO <sub>2</sub> , MACROOH, C <sub>2</sub> H <sub>5</sub> OOH, C <sub>3</sub> H <sub>7</sub> OOH, ROOH, CH <sub>3</sub> OH, PAN, (CH <sub>3</sub> ) <sub>2</sub> CO, CH <sub>3</sub> COCHO, C <sub>2</sub> H <sub>5</sub> OH, GLYALD, HYAC, ONITR, XOOH, ISOPOOH, SO <sub>2</sub> , HCl, HBr, SO <sub>4</sub> , NH <sub>3</sub> , NH <sub>4</sub> NO <sub>3</sub> , SOA, DUST, BC, OC, DMS, SSALT                                                                                                                                                                                                                                                                                                                                                                                                                                                                                     | Naik et al. (2013) and updates to oxidized VOCs dry deposition based on Karl T. et al (2010) |
| HadGEM3-ES   | NO             | Price and Rind (1994) with some parameter updates | NO <sub>3</sub> , N <sub>2</sub> O <sub>5</sub> , HO <sub>2</sub> NO <sub>2</sub> , HONO <sub>2</sub> , H <sub>2</sub> O <sub>2</sub> , HCHO, CH <sub>3</sub> OO, CH <sub>3</sub> OOH, HO <sub>2</sub> , BrONO <sub>2</sub> , HCl, HOCl, HBr, HOBr, ClONO <sub>2</sub> , HONO, EtOOH, n-PrOOH, i-PrOOH, CH <sub>3</sub> COCH <sub>2</sub> OOH,                                                                                                                                                                                                                                                                                                                                                                                                                                                                       | O <sub>3</sub> , NO, NO <sub>3</sub> , NO <sub>2</sub> , N <sub>2</sub> O <sub>5</sub> , HO <sub>2</sub> NO <sub>2</sub> , HONO <sub>2</sub> , H <sub>2</sub> O <sub>2</sub> , CO, HCHO, CH <sub>3</sub> OOH, HCl, HOCl, HBr, HOBr, HONO, EtOOH, CH <sub>3</sub> CHO, PAN, n-PrOOH, i-PrOOH, EtCHO, CH <sub>3</sub> COCH <sub>2</sub> OOH, PPAN, ISOOH, ISON,                                                                                                                                                                                                                                                                                                                                                                                                                                                                                                                                                                                                                                                                                                                                                                                        |                                                                                              |

|               |                                                                            |                                  |                                                                                                                                                                                                                                                                                                                                                                                                                                         |                                                                                                                                                                                                                                                                                                                                                                                                                                                                                             |                                                                    |
|---------------|----------------------------------------------------------------------------|----------------------------------|-----------------------------------------------------------------------------------------------------------------------------------------------------------------------------------------------------------------------------------------------------------------------------------------------------------------------------------------------------------------------------------------------------------------------------------------|---------------------------------------------------------------------------------------------------------------------------------------------------------------------------------------------------------------------------------------------------------------------------------------------------------------------------------------------------------------------------------------------------------------------------------------------------------------------------------------------|--------------------------------------------------------------------|
|               |                                                                            |                                  | ISOOH, ISON, MACROOH, HACET, MGLY, HCOOH, CH <sub>3</sub> CO <sub>3</sub> H, CH <sub>3</sub> CO <sub>2</sub> H, CH <sub>3</sub> OH                                                                                                                                                                                                                                                                                                      | MACR, MACROOH, MPAN, HACET, MGLY, NALD, HCOOH, CH <sub>3</sub> CO <sub>3</sub> H, CH <sub>3</sub> CO <sub>2</sub> H, CH <sub>3</sub> OH                                                                                                                                                                                                                                                                                                                                                     |                                                                    |
| LMDz-REPROBUS | NA                                                                         | NA                               | NA                                                                                                                                                                                                                                                                                                                                                                                                                                      | NA                                                                                                                                                                                                                                                                                                                                                                                                                                                                                          | Climatological tropospheric composition is specified below 400 hPa |
| MRI-ESM1r1    | NO, BC                                                                     | Price and Rind (1992)            | HNO <sub>3</sub> , H <sub>2</sub> O <sub>2</sub> , HO <sub>2</sub> NO <sub>2</sub> , HCl, HBr, COF <sub>2</sub> , HF, CH <sub>2</sub> O, CH <sub>3</sub> OOH, C <sub>2</sub> H <sub>5</sub> OOH, CH <sub>3</sub> CO <sub>3</sub> H, C <sub>3</sub> H <sub>7</sub> OOH, HACET, MGLY, GLYALD, GCOO <sub>2</sub> H, POOH, ISON, ISOPOOH, MACROOH, SO <sub>2</sub> , SO <sub>3</sub> , SO <sub>4</sub> , OCS, DMS, MSA, BC, OC, SSALT, DUST | O <sub>x</sub> , CH <sub>4</sub> , HNO <sub>3</sub> , CO, H <sub>2</sub> O <sub>2</sub> , NO <sub>2</sub> , HO <sub>2</sub> NO <sub>2</sub> , CH <sub>2</sub> O, CH <sub>3</sub> OOH, C <sub>2</sub> H <sub>5</sub> OOH, PAN, ACET, C <sub>3</sub> H <sub>7</sub> OOH, HACET, MGLY, GLYALD, GPAN, GCOO <sub>2</sub> H, ONIT, POOH, MACR, ISON, ISOPOOH, MACROOH, MPAN, SO <sub>2</sub> , SO <sub>3</sub> , SO <sub>4</sub> , OCS, DMS, MSA, BC, OC, SSALT, DUST                             |                                                                    |
| MOCAGE        | NO                                                                         | Price and Rind (1992)            | All species, depending on their solubility                                                                                                                                                                                                                                                                                                                                                                                              | O <sub>x</sub> , H <sub>2</sub> O <sub>2</sub> , NO, NO <sub>2</sub> , NO <sub>3</sub> , N <sub>2</sub> O <sub>5</sub> , HONO, HCl, HNO <sub>3</sub> , HNO <sub>4</sub> , SO <sub>2</sub> , CO, HO <sub>2</sub> , CH <sub>4</sub> , ETH, HC <sub>3</sub> , HC <sub>5</sub> , HC <sub>8</sub> , ETEOLT, OLI, DIEN, ISO, TOL, XYL, CSL, HCHO, ALD, KET, GLY, MGLY, DCB, MACR, UDD, HKET, ONIT, PAN, TPAN, OP1, OP2, PAA, MO <sub>2</sub> , DMS, NH <sub>3</sub> , DMSO, MSA, H <sub>2</sub> S |                                                                    |
| SOCOL         | NO <sub>x</sub>                                                            | Price and Rind (1992)            | HNO <sub>3</sub>                                                                                                                                                                                                                                                                                                                                                                                                                        | CO, NO, NO <sub>2</sub> , O <sub>3</sub> , HNO <sub>3</sub> , H <sub>2</sub> O <sub>2</sub> , H <sub>2</sub>                                                                                                                                                                                                                                                                                                                                                                                |                                                                    |
| ULAQ CCM      | NO <sub>x</sub> , H <sub>2</sub> O, SO <sub>2</sub> , SO <sub>4</sub> , BC | Grewe et al. (2001) [5 Tg-N)/yr] | HNO <sub>3</sub> , H <sub>2</sub> O <sub>2</sub> , HO <sub>2</sub> NO <sub>2</sub> , HCl, HBr, CH <sub>2</sub> O, CH <sub>3</sub> OOH, C <sub>2</sub> H <sub>5</sub> OOH, C <sub>3</sub> H <sub>6</sub> OHOOH, CH <sub>3</sub> CO <sub>3</sub> H, CH <sub>3</sub> CHO, SO <sub>2</sub> , SO <sub>4</sub> , MSA, BC, OC, SSALT, DUST                                                                                                     | O <sub>3</sub> , NO, NO <sub>2</sub> , PAN, HNO <sub>3</sub> , CO, H <sub>2</sub> O <sub>2</sub> , HO <sub>2</sub> NO <sub>2</sub> , CH <sub>2</sub> O, CH <sub>3</sub> OOH, C <sub>2</sub> H <sub>5</sub> OOH, C <sub>3</sub> H <sub>6</sub> OHOOH, CH <sub>3</sub> CO <sub>3</sub> H, CH <sub>3</sub> CHO, SO <sub>2</sub> , SO <sub>4</sub> , MSA, BC, OC, SSALT, DUST                                                                                                                   | Müller and Brasseur (1995)                                         |
| UMUKCA-UCAM   | NO                                                                         | Price and Rind (1992)            | NO <sub>3</sub> , N <sub>2</sub> O <sub>5</sub> , HO <sub>2</sub> NO <sub>2</sub> , HNO <sub>3</sub> , HO <sub>2</sub> , H <sub>2</sub> O <sub>2</sub> , HCHO, CH <sub>3</sub> O <sub>2</sub> , CH <sub>3</sub> OOH, HONO                                                                                                                                                                                                               | O <sub>3</sub> , NO, NO <sub>3</sub> , NO <sub>2</sub> , N <sub>2</sub> O <sub>5</sub> , HNO <sub>4</sub> , HNO <sub>3</sub> , H <sub>2</sub> O, CO, HCHO, CH <sub>3</sub> OOH, HONO                                                                                                                                                                                                                                                                                                        |                                                                    |

Table S17: Heterogeneous reactions, tropospheric surface area density. L = liquid water. LSA: liquid stratospheric aerosol. LTA: liquid (sulfuric) tropospheric aerosol. N: NAT/PSC. I: ice. SO<sub>4</sub>: sulfate. SAD: Sulfuric acid dihydrate. STS: supercooled ternary (H<sub>2</sub>SO<sub>4</sub> / HNO<sub>3</sub> / H<sub>2</sub>O) solution. LA: liquid aerosol. LSA = liquid sulfate aerosol, D = mineral dust. SS = sea salt. Cf table 2.15 of SPARC CCMVal (2010).

| Model name                                    | Cl NO <sub>3</sub> +H <sub>2</sub> O | CINO <sub>3</sub> +HC1 | HOC1+HC1            | N <sub>2</sub> O <sub>5</sub> +H <sub>2</sub> O | N <sub>2</sub> O <sub>5</sub> +HC1 | BrNO <sub>3</sub> +H <sub>2</sub> O | HOBr+HC1 | CINO <sub>3</sub> +HBr | BrNO <sub>3</sub> +HC1 | HOBr+HC1 | HOBr+HBr | HNO <sub>3</sub> + H <sub>2</sub> O |
|-----------------------------------------------|--------------------------------------|------------------------|---------------------|-------------------------------------------------|------------------------------------|-------------------------------------|----------|------------------------|------------------------|----------|----------|-------------------------------------|
| ACCESS CCM HadGEM3-ES NIWA - UKCA UMUKCA-UCAM | N/I/S/O <sub>4</sub>                 | N/I                    | N/I/SO <sub>4</sub> | N/I/SO <sub>4</sub>                             | N/I                                |                                     |          |                        |                        |          |          |                                     |
| CCSR NIES MIROC3.2                            | N/I/STS                              | N/I/STS                | N/I/STS             | N/I/STS                                         | N/I                                | N/I/STS                             | N/I/STS  | N/I                    | N/I                    | N/I/STS  | N/I/STS  |                                     |
| CESM1 CAM4-chem CESM1 WACCM                   | N/I/STS                              | N/I/STS                | N/I/STS             | N/I/STS                                         |                                    | N/I/STS                             | I/STS    |                        |                        | I/STS    |          |                                     |
| CHASER (MIROC-ESM)                            | N/I/STS                              | N/I/STS                | N/I/STS             | N/I/STS                                         | N/I                                | N/I/STS                             | N/I/STS  | N/I                    | N/I                    | N/I/STS  | N/I/STS  |                                     |
| CMA-M                                         | I/STS                                | I/STS                  | I/STS               | LSA/I/STS + LTA                                 |                                    | LSA/I/STS                           | I/STS    |                        | I                      | I/STS    |          |                                     |
| CNRM-CM5-3                                    | N/I/LSA                              | N/I                    | N/I                 | N/I/LSA                                         | N/I                                | N/I                                 | N/I      |                        |                        |          | N/I/LSA  |                                     |
| EMAC                                          | N/I/LSA                              | N/I/LSA                | N/I/LSA             | N/I/LSA + LTA/D/SS                              | N/I/LSA                            | N/I/LSA                             | N/I/LSA  | N/I/LSA                | N/I/LSA                | N/I/LSA  | N/I/LSA  |                                     |
| GEOS CCM                                      | I/N/LSA                              | I/N/LSA                | I/N/LSA             | LSA                                             |                                    | I/N/LSA                             | I/N/LSA  |                        | I/N                    |          |          |                                     |
| GFDL-CM3/AM3                                  | N/I                                  | STS                    | STS                 | STS                                             | STS                                | STS                                 | STS      |                        |                        |          | STS      |                                     |
| LMDz-REPR-OBUS                                | N/I/STS                              | N/I/STS                | N/I/STS             | N/I/STS                                         |                                    | N/I/STS                             | N/I/STS  |                        |                        |          |          |                                     |

|            |         |         |         |         |       |       |       |  |     |       |     |      |
|------------|---------|---------|---------|---------|-------|-------|-------|--|-----|-------|-----|------|
| MRI-ESM1r1 | N/SO4/S | N/I     | N/I     | N/SO4/S | N/I   | SO4/S | N/I   |  |     | N/I   |     |      |
| MOCAGE     | N/STS   | N/STS   | N/STS   | N/STS   | N/STS | N/STS | N/STS |  |     | N/I   | N/I |      |
| SOCOL      | LSA/N/I | LSA/N/I | LSA/N/I | LSA/N/I |       | LSA/I | LSA/I |  |     |       |     |      |
| ULAQCCM    | N/SO4   | N/SO4   | N/SO4   | N/SO4   | N/I   | N/SO4 | N/SO4 |  | N/I | N/SO4 |     | D/SS |

Table S18: Details of tropospheric chemistry (incl. details on deposition schemes), heterogeneous chemistry. l = liquid water droplets; i: ice crystals; SO<sub>4</sub>: sulphate aerosol. OC = organic carbon. NO<sub>3</sub>: nitrate. SS = sea salt. N<sub>2</sub>O<sub>5</sub> + H<sub>2</sub>O is listed under “heterogeneous reactions” in table S17.

| Model name                                        | Deposition scheme                                                 | SO <sub>2</sub> → SO <sub>3</sub> | Further reactions                                                                                                                                                                                      | Surface types for these reactions       | Reference              |
|---------------------------------------------------|-------------------------------------------------------------------|-----------------------------------|--------------------------------------------------------------------------------------------------------------------------------------------------------------------------------------------------------|-----------------------------------------|------------------------|
| ACCESS<br>CCM<br>NIWA-<br>UKCA<br>UMUKCA-<br>UCAM | Zeng and Pyle (2003)                                              | L                                 |                                                                                                                                                                                                        |                                         |                        |
| CESM1<br>CAM4-chem<br>CESM1<br>WACCM              | Wesely (1995)                                                     |                                   | N <sub>2</sub> O <sub>5</sub> → 2 HNO <sub>3</sub><br>NO <sub>3</sub> → HNO <sub>3</sub><br>NO <sub>2</sub> → 0.5 (OH + NO + HNO <sub>3</sub> )<br>HO <sub>2</sub> → 0.5 H <sub>2</sub> O <sub>2</sub> |                                         | Lamarque et al. (2012) |
| CHASER<br>(MIROC-<br>ESM)                         | Wesely (1995)                                                     | l                                 | HO <sub>2</sub> → H <sub>2</sub> O <sub>2</sub> ,<br>RO <sub>2</sub> → ROOH<br>CH <sub>3</sub> OH → HCHO                                                                                               | l,i,SO <sub>4</sub> ,OC,NO <sub>3</sub> |                        |
| EMAC                                              | D(ry)DEP<br>(Kerkweg et al., 2006a);<br>SCAV (Tost et al., 2006a) | l                                 | see references and supplement of Jöckel et al. (2015)                                                                                                                                                  |                                         | Jöckel et al. (2016)   |
| GEOSCCM                                           | Dry dep based on Wang et al. (1998)                               | l                                 |                                                                                                                                                                                                        |                                         |                        |
| GFDL-<br>CM3/AM3                                  | Naik et al. (2013)                                                | l                                 |                                                                                                                                                                                                        |                                         | Tie et al. (2005)      |
| HadGEM3-ES                                        | O'Connor et al. (2014)                                            | l                                 |                                                                                                                                                                                                        |                                         |                        |
| MRI-ESM1r1                                        | Yukimoto et al. (2011);<br>Deushi and Shibata (2011)              | l                                 |                                                                                                                                                                                                        |                                         |                        |
| MOCAGE                                            | dry dep base on Wesely (1989)                                     | l                                 |                                                                                                                                                                                                        |                                         |                        |
| SOCOL                                             | Deposition velocities:<br>Hauglustaine et al. (2004)              | N/A                               | N/A                                                                                                                                                                                                    |                                         |                        |
| ULAQ CCM                                          | Deposition velocities;<br>Müller and Brasseur (1995)              | l/i                               | HNO <sub>3</sub> + H <sub>2</sub> O → NO <sub>3</sub> <sup>-</sup>                                                                                                                                     | dust, SS                                |                        |

Table S19: Microphysics of polar stratospheric clouds (table 2.16 of SPARC CCMVal, 2010). EQ = thermodynamic equilibrium. HY = hysteresis. NAT = nitric acid trihydrate.

| Model name                                           | Sedimentation velocity (mm/s)                         | Thermodynamics   | Transported tracers                                       | PSC | Reference                 |
|------------------------------------------------------|-------------------------------------------------------|------------------|-----------------------------------------------------------|-----|---------------------------|
| ACCESS CCM<br>HadGEM3-ES<br>NIWA-UKCA<br>UMUKCA-UCAM | NAT: 0.46<br>NAT/ice: 17.3                            | EQ               | none                                                      |     | Morgenstern et al. (2009) |
| CCSRNIES<br>MIROC3.2<br>CHASER (MIROC<br>ESM)        | Interactive                                           | EQ               | none                                                      |     | Akiyoshi et al. (2009)    |
| CESM1 CAM4-chem<br>CESM1 WACCM                       | Interactive                                           | EQ               | none                                                      |     | Solomon et al. (2015).    |
| CMAM                                                 | No sedimentation                                      | EQ               | none                                                      |     |                           |
| CNRM-CM 5-3                                          | NAT/ice :<br>recalculated (mean<br>value around 17.3) | EQ               | none                                                      |     | Lefèvre (1994)            |
| EMAC                                                 | Interactive (Kerkweg<br>et al., 2006a)                | NAT: HY; ice: EQ | HNO <sub>3</sub> _nat and 9<br>corresponding size<br>bins |     | Kirner et al. (2011)      |
| GEOSCCM                                              | Interactive                                           | non-EQ           | HNO <sub>3</sub> , H <sub>2</sub> O                       |     | Considine et al. (2000)   |
| GFDL-CM3/AM3                                         | Interactive                                           | EQ               | none                                                      |     | Austin et al. (2013)      |
| LMDz-REPROBUS                                        | NAT:<br>NAT/ice                                       | EQ               | none                                                      |     | Lefevre et al. (1998)     |
| MRI-ESM1r1                                           | NAT: 0.17, ice: 17.4                                  | EQ               | none                                                      |     | Shibata et al. (2005)     |
| MOCAGE                                               | Interactive                                           |                  | HNO <sub>3</sub> , H <sub>2</sub> O                       |     | Carslaw et al. (1995)     |
| SOCOL                                                | Schraner et al. (2008)                                | EQ               | none                                                      |     | Carslaw et al. (1995)     |
| ULAQ CCM                                             | Interactive                                           | non-EQ           | HNO <sub>3</sub> , H <sub>2</sub> O                       |     | Butchart et al. (2010)    |

Table S20: Tropospheric aerosol (categories, bulk/sectional/modal). SS = sea salt. OC = organic carbon. BC = black carbon, SO<sub>4</sub> = sulfate. AOD = aerosol optical depth. DD = dry dust. OM = organic matter

| Model name                             | Type of scheme                                                             | No. of dust tracers | No. of SS tracers | No. of OC tracers | No. of BC tracers | No. of SO <sub>4</sub> tracers | Reference                                        |
|----------------------------------------|----------------------------------------------------------------------------|---------------------|-------------------|-------------------|-------------------|--------------------------------|--------------------------------------------------|
| ACCESS CCM<br>NIWA-UKCA<br>UMUKCA-UCAM | Bulk                                                                       | 6                   | 0                 | 3                 | 3                 | 3                              | Martin et al. (2006)                             |
| CHASER (MIROC-ESM)                     | Bulk                                                                       | 6                   | 4                 | 2                 | 2                 | 1                              | Watanabe et al. (2011)                           |
| CESM1 CAM4-chem<br>CESM1 WACCM         | Bulk                                                                       | 4                   | 4                 | 2                 | 2                 | 1                              | Tie 2005                                         |
| CNRM-CM 5-3                            | monthly AODs of DD, SS, OM, BC and SO <sub>4</sub>                         |                     |                   |                   |                   |                                | Szopa et al. (2012)                              |
| EMAC                                   | prescribed aerosol surface area concentration                              |                     |                   |                   |                   |                                | Righi et al. (2013)<br>LOW_AIR simulation        |
| GEOSCCM                                | Bulk                                                                       | 5                   | 5                 | 2                 | 2                 | 1                              | Colarco et al. (2010)                            |
| GFDL-CM3/AM3                           | Bulk                                                                       | 5                   | 5                 | 2                 | 2                 | 1                              | Levy et al. (2013), Liu et al. (2011)            |
| HadGEM3-ES                             | Bulk                                                                       | 6                   | 0                 | 3                 | 3                 | 3                              | Bellouin et al. (2011);<br>Walters et al. (2014) |
| MRI-ESM1r1                             | sectional for dust and SS; bulk for other species                          | 10                  | 10                | 3                 | 2                 | 1                              | Yukimoto et al. (2011)                           |
| SOCOL                                  | Prescribed aerosol mixing ratios taken from CAM3.5 with bulk aerosol model | 2                   | 2                 | 2                 | 2                 | 1                              |                                                  |
| ULAQ CCM                               | sectional; modal for nitrates                                              | 6                   | 6                 | 6                 | 6                 | 15                             | Pitari et al. (2014, 2015a, 2015b, 2015c)        |

Table S21: Implementation of volcanic effects in REF-C1 (including info on data provider). “CCMI” is the CCMI recommended data set. SAD = surface area density. SPARC = the SPARC dataset as used for CCMVal-2.

| Model name                            | SADs for heterogeneous chemistry | Direct radiative effects                                                                                 | Comment / reference                                                                 |
|---------------------------------------|----------------------------------|----------------------------------------------------------------------------------------------------------|-------------------------------------------------------------------------------------|
| ACCESS CCM<br>NIWA-UKCA               | CCMI                             | Not implemented                                                                                          |                                                                                     |
| CCSRNIES<br>MIROC3.2                  | CCMI                             | Calculated online                                                                                        |                                                                                     |
| CESM1 CAM4-<br>chem<br>CESM1<br>WACCM | CCMI                             | Calculated online using<br>CCMI effective radius                                                         |                                                                                     |
| CHASER<br>(MIROC-ESM)                 | CCMI                             | Calculated online                                                                                        |                                                                                     |
| CMAM                                  | CCMI*                            | Calculated online                                                                                        | extinction at 1020 nm<br>calculated from SAD<br>following Thomason et al<br>(1997). |
| CNRM-CM5-3                            | CCMI                             | for the direct radiative<br>effects the climatology of<br>volcanic AODs is that of<br>Ammann et al. 2007 |                                                                                     |
| EMAC                                  | CCMI                             | Calculated online                                                                                        | Jöckel et al. (2016)                                                                |
| GEOSCCM                               | CCMI                             | Calculated online                                                                                        | Aquila et al. (2012)                                                                |
| GFDL-<br>AM3/CM3                      | Austin et al. (2013).            | Imposed aerosol extinction                                                                               | Austin et al. (2013);<br>Lin et al. (2015a)                                         |
| HadGEM3-ES                            | CCMI                             | Calculated online                                                                                        | Hardiman et al. (2016)                                                              |
| LMDz-<br>REPROBUS                     | CCMI                             | L39 : not implemented                                                                                    |                                                                                     |
| MRI ESM1r1                            | CCMI                             | Calculated online                                                                                        | Yukimoto et al. (2011)                                                              |
| SOCOL                                 | CCMI                             | Calculated online                                                                                        |                                                                                     |
| TOMCAT                                | CCMI                             | Not implemented                                                                                          | Dhomse et al. (2015)                                                                |
| ULAQ CCM                              | CCMI                             | Calculated online                                                                                        | Pitari et al. (2016a); Pitari et<br>al. (2016b); Pitari et al.<br>(2016c)           |
| UMSLIMCAT                             | CCMI                             | Not implemented                                                                                          | Tian and Chipperfield<br>(2005)                                                     |
| UMUKCA-<br>UCAM                       | SPARC                            | Calculated online                                                                                        | SPARC (2006)                                                                        |



Table S22: Photolysis (table 2.14 of SPARC CCMVal, 2010). SZA = solar zenith angle. OC = ozone column. T = temperature. P = pressure.

| Model name                                  | Reference for scheme                                                      | Reference for cross sec. | Online                              | Spectral range (nm)                      | Average resolution (nm)                                                     | Max SZA (degrees) | Temperature range (K)                       | Interpolation parameters    |
|---------------------------------------------|---------------------------------------------------------------------------|--------------------------|-------------------------------------|------------------------------------------|-----------------------------------------------------------------------------|-------------------|---------------------------------------------|-----------------------------|
| ACCESS CCM HadGEM3-ES NIWA-UKCA UМУKCA-UCAM | FAST-JX: Telford et al. (2013) Neu et al. (2007) Lary and Pyle (1991)     | Various                  | Yes (below 60 km); No (above 60 km) | 117-850 nm                               | variable                                                                    | 95/96             | 200-300                                     | T, p, SZA, OC (above 60 km) |
| CCSRNIES MIROC3.2                           | Minschwaner et al. (1993); Kurokawa et al. (2005); Akiyoshi et al. (2016) | JPL (2011)               | Yes                                 | 177.5-690 nm, Lyman- $\alpha$            | 0.90-2.35 (S-R bands), 9.96-100.0 (>200 nm)                                 | 96                | 195-300                                     |                             |
| CESM1CAM4-chem CESM1WACCM                   | TUV4.3, Kinnison et al (2007).                                            | JPL(2011)                | Yes                                 | EUUV, 121nm-750nm                        | Variable, 33 bins from 121-200nm; 67 bins from 200-750nm.                   | 97                | 150-350                                     | T, p, SZA, Albedo, OC       |
| CHASER (MIROC-ESM)                          | Sudo et al. (2002)                                                        | JPL (2011)               | Yes                                 | 185-800                                  | variable                                                                    | 90                | 200-300                                     |                             |
| CMAM                                        | TUV5 (Madronich and Flocke, 1998)                                         | JPL(2011) plus others    | No (online cloud correction)        | 120-735                                  | generally 3 to 4 nm, except 1 nm around 300nm                               | 100               | single profile using US standard atmosphere | p, SZA, OC, albedo          |
| CNRM-CM5-3                                  | TUV 4.1a (Madronich and Flocke, 1998)                                     | JPL (2011)               | No                                  | 116-850                                  | 0.01 (S-R bands); 0.1 (L-alpha); 1 (elsewhere)                              | 94                | 187-288                                     | p, SZA, OC                  |
| EMAC                                        | JVAL (Sander et al. 2014)                                                 | JPL (2011)               | Yes                                 | 175- - 683 nm (8 bands), Lyman- $\alpha$ | 1-5 for precalculation of coefficients; 8 - 260 for bands (with scattering) | 94.5              | Variable                                    |                             |
| GEOSCCM                                     | Bian and Prather (2002)                                                   | JPL (2002)               | Yes                                 | 171-850 nm                               | variable                                                                    | 98                | Variable                                    |                             |
| GFDL-AM3                                    | Fast-JX                                                                   |                          |                                     |                                          |                                                                             |                   |                                             |                             |

|               |                                                               |            |                              |                      |                                                             |    |          |                                                                     |
|---------------|---------------------------------------------------------------|------------|------------------------------|----------------------|-------------------------------------------------------------|----|----------|---------------------------------------------------------------------|
| GFDL-CM3      | TUV4.4                                                        |            |                              |                      |                                                             |    |          |                                                                     |
| LMDz-REPROBUS | TUV 4.1a (Madronich and Flocke, 1998); Marchand et al. (2012) | JPL (2011) | No                           | 116-850 nm           | Variable: 1 nm but enhanced resolution in the 300 nm region | 94 | variable | p, SZA, OC. No explicit chemistry below 400 hPa, just climatologies |
| MRI-ESM1r1    | Deushi and Shibata (2011)                                     | JPL (2006) | No (online cloud correction) | 116.3-735; 171 bands | 0.7-5.0                                                     | 96 | 253-293  | T, p, SZA, OC                                                       |
| MOCAGE        | TUV                                                           |            | No (online cloud correction) |                      | variable                                                    | 95 |          | T, p, SZA, OC                                                       |
| SOCOL         | Rozanov et al. (1999)                                         | JPL (2011) | Yes (LUTs)                   | 121-750, 73 bands    | 1-160; median: 5nm                                          | 98 | Variable |                                                                     |
| ULAQ CCM      | Minschwaner et al. (1993)                                     | JPL (2011) | Yes                          | 119.5-850; 150 bands | 1-10                                                        | 96 | 200-300  |                                                                     |

Table S23: Shortwave radiation. 2-s = Two-stream (cf table 2.10 of SPARC CCMVal, 2010). 2-s = two-stream. UV-Vis = ultra-violet to visible wavelength region. NIR = near infrared.

| Model name                                 | Reference                                                                                                 | Description                | Clouds                                                  | Spectral interval boundaries (nm)                                                                                                                                                                                                                                                                                                                                           | Gas. abs.                                                                                                |
|--------------------------------------------|-----------------------------------------------------------------------------------------------------------|----------------------------|---------------------------------------------------------|-----------------------------------------------------------------------------------------------------------------------------------------------------------------------------------------------------------------------------------------------------------------------------------------------------------------------------------------------------------------------------|----------------------------------------------------------------------------------------------------------|
| ACCESS CCM<br>NIWA-UKCA<br>UMUKCA-<br>UCAM | Edwards and Slingo (1996)<br>Zdunkowski et al. (1980)                                                     | 2-s.                       | Maximum to random overlap                               | [200,320], [320,690], [320,690], [690,1190], [1190,2380], [2380,10000]                                                                                                                                                                                                                                                                                                      | O <sub>2</sub> , O <sub>3</sub> , CO <sub>2</sub> , H <sub>2</sub> O                                     |
| CCSRNIES<br>MIROC3.2                       | Nakajima and Tanaka (1986);<br>Nakajima et al. (2000)                                                     | 2-s.                       | Maximum random overlap (Geleyn and Hollingsworth, 1979) | [200,217], [217,230], [230,278], [278,290], [290,303], [303,317], [317,330], [330,340], [340,355], [355,400], [400,500], [500,600], [600,690], [690,800], [800,1099], [1099,1250], [1250,1667], [1667,2128], [2128,2778], [2778,4000]                                                                                                                                       | O <sub>2</sub> , O <sub>3</sub> , CO <sub>2</sub> , H <sub>2</sub> O                                     |
| CHASER<br>(MIROC-ESM)                      | Nakajima and Tanaka (1986);<br>Nakajima et al. (2000)                                                     | 2-s                        | Maximum random overlap (Geleyn and Hollingsworth, 1979) | [185.185,200], [200,217.4], [217.4,230], [230,277.8], [277.8,289.9], [289.9,303], [303,317.5], [317.5,330], [330,340], [340,355], [355,400], [400,500], [500,600], [600,678], [678,754], [754,784], [784,1000], [1000,1666], [1666,1923], [1923,2127], [2127,2631], [2631,3030], [3030,4000], [4000,5000], [5000,7173], [7173,7547], [7547,8163], [8163,8510], [8510,10204] | O <sub>2</sub> , O <sub>3</sub> , CO <sub>2</sub> , H <sub>2</sub> O                                     |
| CMAM                                       | Fouquart and Bonnel (1980)<br>and Fomichev et al. (2004)                                                  | $\Delta$ -Eddington<br>2-s | maximum random overlap                                  | [250, 690], [690, 1190], [1190, 2380], [2380, 4000]                                                                                                                                                                                                                                                                                                                         | O <sub>2</sub> , O <sub>3</sub> , H <sub>2</sub> O, CO <sub>2</sub>                                      |
| CNRM-CM5-3                                 | Morcrette (1991)                                                                                          | 2-s                        | maximum random overlap                                  | [185,250], [250,440], [440,690], [690,1190], [1190-2380], [2380,4000]                                                                                                                                                                                                                                                                                                       | O <sub>3</sub> , H <sub>2</sub> O, O <sub>2</sub> , CO <sub>2</sub> , CH <sub>4</sub> , N <sub>2</sub> O |
| EMAC                                       | Dietmüller et al. (2016);<br>Kunze et al. (2014);<br>Roekner et al. (2003);<br>Fouquart and Bonnel (1980) | $\Delta$ -Eddington<br>2-s | Maximum random overlap                                  | [250, 690], [690,1190], [1190, 2380], [2380, 4000];<br><br>< 70 hPa: 55 intervals [121.5,690]                                                                                                                                                                                                                                                                               | O <sub>2</sub> , O <sub>3</sub> , CO <sub>2</sub> , H <sub>2</sub> O                                     |
| GEOSCCM                                    | Chou and Suarez (1999);<br>Sud et al. (1993);<br>Chou et al. (1997)                                       | $\Delta$ -Eddington<br>2-s | Maximum random overlap                                  | [175-225], [225-245], [245-260], [260-280], [280-295], [295-310], [310-320], [320-400], [400-700], [700-1220], [1220-2270], [2270-10000]                                                                                                                                                                                                                                    | O <sub>2</sub> , O <sub>3</sub> , CO <sub>2</sub> , H <sub>2</sub> O                                     |
| GFDL-<br>CM3/AM3                           | Donner et al. (2011)                                                                                      | 2-s                        | Donner et al. (2011)                                    | Donner et al. (2011)                                                                                                                                                                                                                                                                                                                                                        | Donner et al. (2011)                                                                                     |
| HadGEM3-ES                                 | Walters et al. (2014)                                                                                     | 2-s.                       | Maximum to random overlap                               | [200,320], [320,690], [320,690], [690,1190], [1190,2380], [2380,10000]                                                                                                                                                                                                                                                                                                      | O <sub>2</sub> , O <sub>3</sub> , CO <sub>2</sub> , H <sub>2</sub> O                                     |
| LMDz-<br>REPROBUS                          | Dufresnes et al. (2013)                                                                                   | 2-s.                       | Parameterized (including overlapping)                   | L39: [250,680], [680,4000]<br>L79: [185,250], [250,440], [440,690], [690,1190], [1190,2380], [2380,4000]                                                                                                                                                                                                                                                                    | O <sub>2</sub> , O <sub>3</sub> , CH <sub>4</sub> , CO <sub>2</sub> , H <sub>2</sub> O, N <sub>2</sub> O |

|            |                                                                   |                             |                        |                                                                                                                                                                                             |                                                                                                             |
|------------|-------------------------------------------------------------------|-----------------------------|------------------------|---------------------------------------------------------------------------------------------------------------------------------------------------------------------------------------------|-------------------------------------------------------------------------------------------------------------|
| MRI-ESM1r1 | Yukimoto et al. (2011)                                            | 2-s. ( $\Delta$ -Eddington) | Maximum random overlap | [174,231], [231,250], [250,274], [274,283], [283,290], [290,296], [296,303], [303,313], [313,333], [333,364], [364,407], [407,448], [448,500], [500,599], [599,685], 7 intervals [700-5000] | O <sub>2</sub> , O <sub>3</sub> , CO <sub>2</sub> , H <sub>2</sub> O                                        |
| SOCOL      | Fouquart and Bonnel (1980); Cagnazzo et al. (2007)                | $\Delta$ -Eddington 2-s.    | Maximum random overlap | [185,250], [250,440], [440,690], [690,1190], [1190,2380], [2380,4000]                                                                                                                       | O <sub>3</sub> , H <sub>2</sub> O, CO <sub>2</sub> , N <sub>2</sub> O, CO, CH <sub>4</sub> , O <sub>2</sub> |
| ULAQ CCM   | Randles et al., (2013); Pitari et al. (2014, 2015a, 2015b, 2015c) | 2-s                         | Maximum random overlap | 150 UV-VIS bands, 100 NIR bands covering [119.5, 7000]                                                                                                                                      | O <sub>2</sub> , O <sub>3</sub> , NO <sub>2</sub> , CO <sub>2</sub> , H <sub>2</sub> O, SO <sub>2</sub>     |

Table S24: Longwave radiation (table 2.11 of SPARC CCMVal, 2010)

| Model name           | Reference                                              | Description                                                   | Spectral interval boundaries ( $\mu\text{m}$ )                                                                                                                                                                                                  | Gas abs.                                                                                                                                                                   | Chem. heating        | Non-LTE              |
|----------------------|--------------------------------------------------------|---------------------------------------------------------------|-------------------------------------------------------------------------------------------------------------------------------------------------------------------------------------------------------------------------------------------------|----------------------------------------------------------------------------------------------------------------------------------------------------------------------------|----------------------|----------------------|
| ACCESS CCM NIWA-UKCA | Edwards and Slingo (1996), Zdunkowski et al. (1980)    | 2-s.                                                          | [25,10000], [18.2,25], [12.5,18.2], [13.3,16.9], [8.33,12.5], [8.93,10.1], [7.52,8.33], [6.67,7.52], [3.34,6.67]                                                                                                                                | H <sub>2</sub> O, CO <sub>2</sub> , O <sub>3</sub> , CH <sub>4</sub> , N <sub>2</sub> O, F11 (rescaled), F12 (rescaled)                                                    | NO                   | NO                   |
| CCSRNIES MIROC3.2    | Nakajima et al. (2000)                                 | 2-s.                                                          | [4.00,5.00], [5.00,7.14], [7.14,8.51], [8.51,10.2], [10.2,12.2], [12.2,13.3], [13.3,14.9], [14.9,16.4], [16.4,18.9], [18.9,40.0], [40.0,1000.]                                                                                                  | H <sub>2</sub> O, CO <sub>2</sub> , O <sub>3</sub> , CH <sub>4</sub> , N <sub>2</sub> O, CFCs                                                                              | NO                   | NO                   |
| CHASER (MIROC-ESM)   | Nakajima et al. (2000)                                 | 2-s                                                           | [12.2,13.3], [13.3,14.9], [14.9,16.4], [16.4,18.9], [18.9,25], [25,40], [40,1000]                                                                                                                                                               | H <sub>2</sub> O, CO <sub>2</sub> , O <sub>3</sub> , CH <sub>4</sub> , N <sub>2</sub> O, CFCs/HFCs                                                                         | NO                   | NO                   |
| CMAM                 | Morcrette (1991); Fomichev et al. (2004)               | 2-s up to 39 hPa transitioning to Matrix param. above 6.7 hPa | 2-s: [6.9, 8.0 : 3.5, 5.3], [9.0, 10.3], [10.3, 12.5 : 8.0, 9.0], [12.5, 20.0], [20.0, 28.6], [28.6, 10000 : 5.3, 6.9]<br>Matrix param: 15 $\mu\text{m}$ CO <sub>2</sub> ; 9.6 $\mu\text{m}$ O <sub>3</sub> ; rotational H <sub>2</sub> O bands | 2-s: H <sub>2</sub> O, CO <sub>2</sub> , O <sub>3</sub> , CH <sub>4</sub> , N <sub>2</sub> O, F11, F12<br>Matrix param: H <sub>2</sub> O, CO <sub>2</sub> , O <sub>3</sub> | Yes                  | Yes                  |
| CNRM-CM 5-           | Morcrette 2001                                         | 2-s                                                           | Spectral interval boundaries (cm-1) 16<br>[10,250], [250,500], [500,630], [630,700], [700,820], [820,980], [980,1080], [1080,1180], [1180,1390], [1390,1480], [1480,1800], [1800,2080], [2080,2250], [2250,2380], [2380,2600], [2600,3000]      | H <sub>2</sub> O, CO <sub>2</sub> , O <sub>3</sub> , CH <sub>4</sub> , N <sub>2</sub> O, F11, F12                                                                          | NO                   | NO                   |
| EMAC SOCOL           | Mlawer et al. (1997)                                   | k-correlated method, RRTM                                     | [40,1000], [20,40], [15.87,20], [14.29,15.87], [12.2,14.29], [10.2,12.2], [9.26,10.2], [8.47,9.26], [7.19,8.47], [6.76,7.19], [5.56,6.76], [4.81,5.56], [4.44,4.81], [4.2,4.44], [3.85,4.2], [3.33,3.85]                                        | H <sub>2</sub> O, CO <sub>2</sub> , O <sub>3</sub> , CH <sub>4</sub> , N <sub>2</sub> O, F12, F11                                                                          | NO                   | NO                   |
| GEOSCCM              | Chou et al. (2001)                                     | k-distribution and table look-up                              | [29.4,10000], [18.5,29.4], [16.1,18.5], [13.9,16.1], [12.5,13.9], [10.2,12.5], [9.09,10.2], [8.23,9.09], [7.25,8.23], [5.26,7.25], [3.33,5.26]                                                                                                  | H <sub>2</sub> O, CO <sub>2</sub> , O <sub>3</sub> , CH <sub>4</sub> , N <sub>2</sub> O, F11, F12, H22                                                                     | No                   | No                   |
| GFDL-CM3/AM3         | Donner et al. (2011)                                   | Donner et al. (2011)                                          | Donner et al. (2011)                                                                                                                                                                                                                            | Donner et al. (2011)                                                                                                                                                       | Donner et al. (2011) | Donner et al. (2011) |
| HadGEM3-ES           | Walters et al. (2014)                                  | 2-s.                                                          | [25,10000], [18.2,25], [12.5,18.2], [13.3,16.9], [8.33,12.5], [8.93,10.1], [7.52,8.33], [6.67,7.52], [3.34,6.67]                                                                                                                                | H <sub>2</sub> O, CO <sub>2</sub> , O <sub>3</sub> , CH <sub>4</sub> , N <sub>2</sub> O, F11 (rescaled), F12 (rescaled), H134a (rescaled)                                  | NO                   | NO                   |
| LMDz-REPROBUS        | Dufresnes et al., 2013                                 | 2-s.                                                          | [3.55,8], [8,10.31], [10.31,12.5], [12.5,20], [20,28.57], [28.57,1000]<br>wavenumbers 0 to $2.82 \times 10^5 \text{ m}^{-1}$                                                                                                                    | O <sub>3</sub> , CH <sub>4</sub> , CO <sub>2</sub> , H <sub>2</sub> O, N <sub>2</sub> O, F11, F12                                                                          | NO                   | NO                   |
| MRI-ESM1r1           | Yukimoto et al. (2011)                                 | 2-s. k-distribution and table look-up                         | [3.33,5.26], [5.26,7.25], [7.25,8.23], [8.23,9.09], [9.09, 10.2], [10.2, 12.5], [12.5,13.9], [13.9,16.1], [16.1,18.5], [18.5, 29.4], [29.4, 1000.]; wave numbers 0 to 3000 cm-1                                                                 | H <sub>2</sub> O, CO <sub>2</sub> , O <sub>3</sub> , CH <sub>4</sub> , N <sub>2</sub> O, F11, F12, H22                                                                     | No                   | No                   |
| ULAQ CCM             | Chou et al. (2001); Pitari et al. (2014, 2015a, 2015c) | 2-s. k-correlated method                                      | [3.3,5.3], [5.3,7.2], [7.2,8.2], [8.2,9.1], [9.1, 10.2], [10.2, 12.5], [12.5,16.1], [16.1,18.5], [18.5, 29.4], [29.4, 1000.]                                                                                                                    | H <sub>2</sub> O, CO <sub>2</sub> , O <sub>3</sub> , CH <sub>4</sub> , N <sub>2</sub> O, F11, F12, H22                                                                     | No                   | No                   |

|                 |                                                                 |      |                                                                                                                     |                                                                                                                 |    |    |
|-----------------|-----------------------------------------------------------------|------|---------------------------------------------------------------------------------------------------------------------|-----------------------------------------------------------------------------------------------------------------|----|----|
| UMUKCA<br>-UCAM | Edwards and<br>Slingo<br>(1996),<br>Zdunkowski<br>et al. (1980) | 2-s. | 25,10000], [18.2,25], [12.5,18.2], [13.3,16.9],<br>8.33,12.5], [8.93,10.1], [7.52,8.33],<br>6.67,7.52], [3.34,6.67] | H <sub>2</sub> O, CO <sub>2</sub> , O <sub>3</sub> , CH <sub>4</sub> , N <sub>2</sub> O,<br>F11, F12, F113, H22 | No | No |
|-----------------|-----------------------------------------------------------------|------|---------------------------------------------------------------------------------------------------------------------|-----------------------------------------------------------------------------------------------------------------|----|----|

Table S25: Specify the solar/galactic forcing used in the simulations except SEN-C1-SSI. SWR = short-wave radiation. TSI = total solar irradiance.

| Model name              | Spectrally resolved irradiance data | Proton ionization     | Galactic cosmic ray forcing | Consistency between SWR and photolysis | Consistency between TSI and SSI data | Solar forcing in all sims | Comments                                                            |
|-------------------------|-------------------------------------|-----------------------|-----------------------------|----------------------------------------|--------------------------------------|---------------------------|---------------------------------------------------------------------|
| ACCESS-CCM<br>NIWA-UKCA | Y                                   | N                     | N                           | N                                      | N                                    | N                         | No solar variability                                                |
| GEOS-CCM                | Y                                   | N                     | N                           | N                                      | N                                    | N                         |                                                                     |
| CCSR-NIES-MIRO-C3.2     | Lean et al. (2005)                  | N                     | N                           | N                                      | Y                                    | Y                         |                                                                     |
| CESM1-CAM4-chem         | Lean et al. (2005)                  | N                     | N                           | N                                      | Y                                    | Y                         |                                                                     |
| CESM1-WACCM             | Lean et al. (2005)                  | Y                     | Y                           | N                                      | Y                                    | Y                         |                                                                     |
| CHASER (MIROC-ESM)      | Lean et al. (2005)                  | N                     | N                           | N                                      | Y                                    | Y                         |                                                                     |
| EMAC                    | Lean et al. (2005)                  | N                     | N                           | Y                                      | Y                                    | Y                         |                                                                     |
| HadGEM3-ES              | Solanki and Krivova (2003)          | N                     | N                           | Y                                      | Y                                    | Y                         |                                                                     |
| LMDz-REPROBUS           | Lean et al. (2005)                  | N                     | N                           | N                                      | Y                                    | Y                         | Monthly mean data calculated from the original daily data are used. |
| MRI-ESM1r1              | Y                                   | Y                     | N                           | Y                                      | Y                                    | Y                         | Monthly mean data calculated from the original daily data is used.  |
| SOCOL                   | Sukhodolov et al. (2014)            | Rozanov et al. (2012) | N                           | Y                                      | Y                                    | Y                         |                                                                     |

|             |   |   |   |   |   |   |                                                           |
|-------------|---|---|---|---|---|---|-----------------------------------------------------------|
| TOMCAT      | Y | N | N | N | Y | Y | Dhomse et al. (2011, 2013)                                |
| ULAQCCM     | Y | N | N | Y | Y | Y | Monthly mean data calculated from the original daily data |
| UMSLIMCAT   | Y | N | N | N | Y | Y | Dhomse et al. (2011)                                      |
| UMUKCA-UCAM | Y | N | N | N | N | Y |                                                           |

Table S26: Same as above, but for the SEN-C1-SSI simulations.

| Model name | Spectrally resolved irradiance data | Proton ionization | Galactic cosmic ray forcing | Consistency between SWR and photolysis | Consistency between TSI and SSI data | Solar forcing in all sims | Comments                                                  |
|------------|-------------------------------------|-------------------|-----------------------------|----------------------------------------|--------------------------------------|---------------------------|-----------------------------------------------------------|
| TOMCAT     | Y                                   | N                 | N                           | N                                      | Y                                    | Y                         | Dhomse et al. (2011, 2013)                                |
| ULAQCCM    | Y                                   | N                 | N                           | Y                                      | Y                                    | Y                         | Monthly mean data calculated from the original daily data |
| UMSLIMCAT  | Y                                   | N                 | N                           | N                                      | Y                                    | Y                         | Dhomse et al. (2011)                                      |



Table S27: Sea surface (SST) and sea ice data sets used for CCMI simulations. HadISST is the recommended SST/sea ice dataset for the REF-C1 and SEN-C1 simulations.

| Model name                     | SST/sea ice for REF-C1, REF-C1SD, SEN-C1 (all)                            | SST/sea ice for REF-C2, SEN-C2                 | Reference for SST/sea ice used in REF-C2      |
|--------------------------------|---------------------------------------------------------------------------|------------------------------------------------|-----------------------------------------------|
| ACCESS CCM                     | HadISST                                                                   | Prescribed                                     |                                               |
| CCSRNIES MIROC3.2              | HadISST                                                                   | Prescribed (MIROC/IPCC-AR5)                    | Watanabe et al. (2010)                        |
| CESM1 CAM4-chem<br>CESM1 WACCM | HadISST                                                                   | Interactive                                    | Meehl et al. (2013)                           |
| CHASER (MIROC-ESM)             | HadISST                                                                   | HadICE                                         | Hewitt et al. (2011)                          |
| CMAM                           | HadISST                                                                   | Prescribed (CanCM4 RCP6.0)                     |                                               |
| CNRM-CM 5-3                    | REF-C1: HadISST<br>REF-C1SD: ERA-Interim<br>Reanalysis (Dee et al., 2011) | Prescribed (CNRM-CM5.1 RCP6.0)                 | Voldoire et al. (2012)                        |
| EMAC                           | REF-C1: HadISST<br>REF-C1SD: ERA-Interim                                  | Prescribed (HadGEM2-ES; one sim. interactive)  | Collins et al. (2011)                         |
| GEOSCCM                        | HadISST                                                                   | Prescribed (CESM1)                             | Meehl et al. (2013)                           |
| GFDL-CM3/AM3                   | HadISST                                                                   | Interactive                                    | Griffies et al. (2011)                        |
| HadGEM3-ES                     | HadISST                                                                   | Interactive                                    | Rayner et al. (2003)                          |
| LMDz-REPROBUS                  | AMIP                                                                      | Prescribed (SRES A1B IPSL)                     | Dufresnes et al., (2013); Szopa et al. (2013) |
| MRI-ESM1r1                     | HadISST                                                                   | Interactive                                    | Yukimoto et al. (2012)                        |
| NIWA UKCA                      | HadISST                                                                   | Interactive                                    | Hewitt et al. (2011)                          |
| SOCOL                          | HadISST                                                                   | Prescribed (CESM1-CAM5)                        | Meehl et al. (2013)                           |
| ULAQ CCM                       | HadISST                                                                   | Prescribed (HadISST + various CCSM4.CAM sims.) |                                               |

Table S28: Details on ocean forcing/coupling.

| Model name         | Atmos. Module    | Ocean module       | Sea ice module | Coupling frequency | Fields passed to atmosphere                                                                                                                                          | Fields passed to ocean                                                                                                                                                                                                                                                                                                                                 | Fields passed to sea ice                                                                                                                                                                                                                                                                                          | Reference                                  |
|--------------------|------------------|--------------------|----------------|--------------------|----------------------------------------------------------------------------------------------------------------------------------------------------------------------|--------------------------------------------------------------------------------------------------------------------------------------------------------------------------------------------------------------------------------------------------------------------------------------------------------------------------------------------------------|-------------------------------------------------------------------------------------------------------------------------------------------------------------------------------------------------------------------------------------------------------------------------------------------------------------------|--------------------------------------------|
| CHASER (MIROC-ESM) | CCSR/NIES AGCM   | CoCo v4            | MIROC          | < ~1day            |                                                                                                                                                                      |                                                                                                                                                                                                                                                                                                                                                        |                                                                                                                                                                                                                                                                                                                   | Watanabe et al. (2011)                     |
| EMAC               | ECHAM5.3.02      | MPIOM 1.3.0        | MPIOM 1.3.0    | 2 hr               | sea surface temperature<br>ice thickness<br>ice compactness (fraction of ice)<br>snow thickness<br>zonal surface water velocity<br>meridional surface water velocity | zonal wind stress over water;<br>meridional wind stress over water;<br>zonal wind stress over ice;<br>meridional wind stress over ice;<br>solid freshwater flux;<br>liquid freshwater flux;<br>residual heat flux over ice;<br>conductive heat flux over ice;<br>net heat flux over water;<br>downward shortwave radiation;<br>10 meter wind velocity; |                                                                                                                                                                                                                                                                                                                   | Pozzer et al. (2011)                       |
| HadGEM3-ES         | GA4.0 (UM vn8.2) | NEMO vn3.4, ORCA 1 | CICE vn4.1     | 3 hours            | Ocean SST, Sea ice fraction, Sea ice depth, snow thickness, surface layer temperature of ice, surface layer conductivity of ice, ocean surface velocity              | Surface wind stress, heat flux, total rainfall, total snowfall, evaporation, 10 meter wind speed, river runoff, top melt, bottom melt,<br><br>Ocean-ice stress, Freshwater fluxes, solar radiation, heat flux, ice velocity, snow and ice thickness, top layer temperature and effective conductivity.                                                 | Wind stress, Surface downward latent heat flux, GBM conductive flux through ice, GBM surface heat flux, wind speed, Incoming SW, Incoming LW, Air temperature, Potential temperature, Air density, Specific Humidity, Atmos level height, snowfall, rainfall, freezing/melting potential, SST, SSS, Surface ocean | Walters et al. (2014), Madec et al. (2008) |

|               |                     |            |            |         |                                                                                                                                              |                                                                                                                                                        |                                                                                                                                                        |                                              |
|---------------|---------------------|------------|------------|---------|----------------------------------------------------------------------------------------------------------------------------------------------|--------------------------------------------------------------------------------------------------------------------------------------------------------|--------------------------------------------------------------------------------------------------------------------------------------------------------|----------------------------------------------|
|               |                     |            |            |         |                                                                                                                                              |                                                                                                                                                        | current, Sea surface slope.                                                                                                                            |                                              |
| LMDz-REPROBUS | LMDZ                | NEMO       | LIM        | < ~1day | sea ice fraction and albedo, sea ice temperature, sea surface temperature                                                                    | Radiative fluxes, wind stress, runoff, ice sheet melting, fresh water flux, sea ice fraction                                                           | Radiative properties, water budget, solid precipitation, wind stress over sea ice, sea surface temperature, salinity, surface current                  | Marti et al. (2010); Dufresnes et al. (2013) |
| MRI-ESM1r1    | MRI-AGCM3           | MRI.COM3   | MRI.COM3   | 1 hr    | temperature, salinity, and velocity in the first level, fractional area of ice pack, ice/snow thickness, temperature at the ice/snow surface | precipitation, SLP, wind at 10m, wind stress, water flux, heat fluxes, LW/SW radiation, evaporation/condensation/sublimation, surface skin temperature | precipitation, SLP, wind at 10m, wind stress, water flux, heat fluxes, LW/SW radiation, evaporation/condensation/sublimation, surface skin temperature | Yukimoto et al. (2011)                       |
| NIWA-UKCA     | GA2 (UM 7.3) N48L60 | NEMO ORCA2 | CICE vn4.0 | 1 day   | ice concs., snow thickness, eff. ice depth, surface u & v, SST                                                                               | surface stress, freshwater flux, solar radiation, heat flux<br>Runoff out of ocean, salt flux, ice conc.                                               | wind stress snowfall, rainfall, freshwater flux, heat fluxes, freezing/melt potential, salt flux. ice conc.                                            | Hewitt et al. (2011)                         |

Table S29: Surface, soil, and boundary layer scheme

| Model name                             | Land surface scheme (reference)                                      | Soil moisture (reference)                                            | Planetary boundary layer scheme (reference)                                  |
|----------------------------------------|----------------------------------------------------------------------|----------------------------------------------------------------------|------------------------------------------------------------------------------|
| ACCESS CCM<br>NIWA-UKCA<br>UMUKCA-UCAM | Hewitt et al. (2011)                                                 | Hewitt et al. (2011)                                                 | Hewitt et al. (2011)                                                         |
| CESM1 CAM4-chem<br>CESM1 WACCM         |                                                                      |                                                                      | Vertical fluxes scheme:<br>Holtslag and Boville (1993)                       |
| CHASER (MIROC-ESM)                     | Takata et al. (2003)                                                 | Takata et al. (2003)                                                 |                                                                              |
| CMAM                                   | Verseghy (2000)                                                      | Verseghy (2000)                                                      | Scinocca et al. (2008)                                                       |
| CNRM-CM 5-3                            | Noilhan and Planton (1989)<br>Douville et al. (2000)                 | Noilhan and Planton (1989)<br>Douville et al. (2000)                 | Boundary layer based on<br>Louis (1982) modified by<br>Mascart et al. (1995) |
| EMAC                                   | Roeckner et al. (2003)                                               | Roeckner et al. (2003)                                               | Roeckner et al. (2003)                                                       |
| GEOSCCM                                | Koster et al. (2000) coupled<br>to snow model of Stieglitz<br>(2001) | Koster et al. (2000) coupled<br>to snow model of Stieglitz<br>(2001) | estimate from combined<br>Lock (2000) with Louis and<br>Geleyn (1982)        |
| GFDL-CM3/AM3                           | Donner et al. (2011)                                                 | Donner et al. (2011)                                                 | Donner et al. (2011)                                                         |
| HadGEM3-ES                             | Walters et al. (2014)                                                | Walters et al. (2014)                                                | Walters et al. (2014)                                                        |
| LMDz-REPROBUS                          | Dufresnes et al. (2013)                                              | Dufresnes et al. (2013)                                              | Dufresnes et al. (2013)                                                      |
| MRI-ESM1r1                             | Yukimoto et al. (2011)                                               | Yukimoto et al. (2011)                                               | Yukimoto et al. (2011)                                                       |
| SOCOL                                  | Roeckner et al. (2003)                                               | Roeckner et al. (2003)                                               | Roeckner et al. (2003)                                                       |

Table S30: Details of nudging in the specified-dynamics simulations. ERAI = ERA-Interim (<http://www.ecmwf.int/en/research/climate-reanalysis/era-interim>). CIRA = Cooperative Institute for Research in the Atmosphere (<http://www.cloudsat.cira.colostate.edu>). MERRA = Modern Era Retrospective ReAnalysis (<https://disc.gsfc.nasa.gov/mdisc/overview>). NCEP/NCAR = National Center for Environmental Prediction / National Center for Atmospheric Research (<http://www.esrl.noaa.gov/psd/data/gridded/data.ncep.reanalysis.html>). JRA-55 = Japanese 55-year ReAnalysis ([http://jra.kishou.go.jp/JRA-55/index\\_en.html](http://jra.kishou.go.jp/JRA-55/index_en.html)).

| Model name            | Pressure/height range of nudging                                                                                                                    | Newtonian relaxation timescale                    | Spectral nudging (Y/N) | Nudged variables                                                                                  | Source of nudging data                                          | Reference                               |
|-----------------------|-----------------------------------------------------------------------------------------------------------------------------------------------------|---------------------------------------------------|------------------------|---------------------------------------------------------------------------------------------------|-----------------------------------------------------------------|-----------------------------------------|
| CCSRNIES<br>MIROC3.2  | 1000-1 hPa<br>1-0.01 hPa                                                                                                                            | 1 day<br>1 day                                    | Y<br>Y                 | u, v, T, zonal-mean<br>u and T                                                                    | ERAI<br>CIRA                                                    | Akiyoshi et al. (2016)                  |
| CESM1<br>CAM4-chem    | Surface - top                                                                                                                                       | 50 hours                                          | N                      | u, v, T, ps, surface stress, latent, sensible heat flux                                           | MERRA                                                           | Lamarque et al. (2012)                  |
| CESM1<br>WACCM        | Surface - 50km<br>(transition 40-50km)                                                                                                              | 50 hours                                          | N                      | u, v, T, ps, surface stress, latent, sensible heat flux                                           | MERRA                                                           | Lamarque et al. (2012)                  |
| CHASER<br>(MIROC-ESM) | 900-10 hPa                                                                                                                                          | 0.8 day for u/v, 7 days for T                     | N                      | u, v, T                                                                                           | ERAI                                                            |                                         |
| CNRM-CM5-3            | Nudging is applied to the entire atmosphere and all model levels, with a transition zone from the surface over the last five model levels.          | 5-hour e-folding time.                            | N                      | u, v, T, q                                                                                        | ERAI                                                            | Douville (2009)                         |
| EMAC                  | The boundary layer and the stratosphere / middle atmosphere above 10 hPa are not nudged with transition layers of intermediate strengths inbetween. | 48 h<br>6 h<br>24 h<br>24 h                       | Y                      | Divergence<br>vorticity<br>temperature (with and without wave 0), (logarithm of) surface pressure | ERAI                                                            | Jöckel et al. (2016)                    |
| GFDL-AM3              | Surface to 10 hPa                                                                                                                                   | 6 h (surface)<br>60 h (100 hPa)<br>600 h (10 hPa) | N                      | u, v                                                                                              | NCEP/NCAR                                                       | Lin et al. (2012a; 2014; 2015a; 2015b). |
| HadGEM3-ES            | 2.6km-51.1km                                                                                                                                        | 1 day                                             | N                      | u, v, T                                                                                           | ERAI with anomaly correction following McLandress et al. (2014) | McLandress et al. (2014)                |
| LMDz-REPROBUS         | Surface to 0.1 hPa                                                                                                                                  | 3 hrs for u and v<br>0.5 hrs for T                | N                      | u, v, T                                                                                           | ERAI                                                            | Dufresnes et al., (2013)                |
| MOCAGE                | Surface to 5 hPa                                                                                                                                    | Direct CTM                                        | N                      | u, v, T, q                                                                                        | ERAI                                                            |                                         |
| MRI-ESM1r1            | 870-1 hPa                                                                                                                                           | 24 h (870-40 hPa)<br>24-∞ h (40-1 hPa)            | N                      | u, v, T                                                                                           | JRA-55                                                          | Deushi and Shibata (2011)               |
| TOMCAT                | Surface to 60 km                                                                                                                                    | Direct CTM                                        | N                      | u, v, T                                                                                           | ERAI                                                            | Chipperfield (2006)                     |
